1 **An ER-resident calcium binding protein modulates egress of malaria parasites**  
2 **from erythrocytes**

3 Manuel A. Fierro<sup>1,2</sup>, Miryam A. HortuaTriana<sup>1</sup>, Carrie F. Brooks<sup>1</sup>, Beejan Asady<sup>1</sup>,  
4 Catherine Li<sup>1</sup>, Silvia N.J. Moreno<sup>1,2</sup>, and Vasant Muralidharan<sup>1,2</sup>

5 <sup>1</sup>Center for Tropical and Emerging Global Diseases

6 <sup>2</sup>Department of Cellular Biology

7 University of Georgia, Athens, GA, USA

8 Address correspondence to Vasant Muralidharan, [vasant@uga.edu](mailto:vasant@uga.edu)

9

10

11

12

13

14

15

16

17

18

19

20

21

22

23

24 **Abstract**

25 Calcium signaling pathways coordinate the lifecycle progression of apicomplexan  
26 parasites, specifically playing a key role in egress from host cells. The main  $\text{Ca}^{2+}$ -signaling  
27 hub in these divergent eukaryotic parasites is presumed to be the endoplasmic reticulum  
28 (ER); however, no proteins involved in  $\text{Ca}^{2+}$ -signaling have been identified in the ER of  
29 these deadly human parasites. In this study, we explored the role of the Endoplasmic  
30 Reticulum-resident Calcium-binding protein (ERC) in the lifecycle of two apicomplexan  
31 parasites, *Toxoplasma gondii* and *Plasmodium falciparum*. We find that the *Toxoplasma*  
32 ortholog (TgERC) plays a role in the storage of  $\text{Ca}^{2+}$  in the ER but is dispensable for the  
33 asexual lytic cycle. On the other hand, the *Plasmodium* ortholog (PfERC) is essential for  
34 asexual growth but not required for  $\text{Ca}^{2+}$  storage, organelle biogenesis, or protein  
35 trafficking. Instead, knockdown of PfERC inhibits parasite egress and invasion. Our  
36 results show that PfERC is critical for the rupture of the parasitophorous vacuole  
37 membrane, which is the first step in the egress of malaria parasites from erythrocytes.  
38 Surprisingly, PfERC knockdown does not affect the  $\text{Ca}^{2+}$ -dependent autoprocessing of  
39 the key egress protease, SUB1, but knockdown inhibits the second proteolytic maturation  
40 of SUB1 that occurs during its secretion from exoneme vesicles. We have therefore  
41 identified the first ER-resident protein in *Plasmodium* that modulates egress of malaria  
42 parasites.

43

44

45

46

47

48

49

50

51

## 52 Introduction

53 Members of the phylum *Apicomplexa* are responsible for severe human diseases  
54 such as malaria, toxoplasmosis, and cryptosporidiosis. Together, this group of obligate  
55 intracellular parasites causes several hundred million infections every year and remains  
56 one of the major drivers of infant mortality (1-4). In fact, malaria results in nearly half a  
57 million deaths each year and most of the mortality is attributed to one species,  
58 *Plasmodium falciparum*. All the clinical symptoms of malaria are directly correlated to the  
59 invasion and lysis of the host red blood cells by these parasites. Malaria remains a vast  
60 health and economic burden in susceptible parts of the world and, despite continuous  
61 attempts for eradication and control, there is no effective vaccine and resistance has  
62 emerged to all existing drugs (5-8). This highlights the importance of understanding the  
63 factors that control the intracellular growth and development of the parasite, which will  
64 lead to the identification of key targets for antimalarial drug development.

65 Egress and invasion of apicomplexan parasites are ordered and essential  
66 processes which are regulated by signaling pathways dependent upon the second  
67 messengers, cGMP and Ca<sup>2+</sup> (9-13). Upon invading the host cell, the parasites create  
68 and reside within a host-derived vacuole called the parasitophorous vacuole (PV). Within  
69 this vacuole, the parasites grow and divide into daughter cells, called merozoites in  
70 *Plasmodium*, which must egress from the host cell to complete the life cycle. This event  
71 is triggered by the activation of a cGMP dependent protein kinase (PKG) and the inhibition  
72 of PKG activity blocks egress (10, 14, 15). Ca<sup>2+</sup>-signaling also induces egress although it  
73 is uncertain whether this pathway works downstream (11) or synergistically with cGMP  
74 signaling (10, 16, 17). For example, studies have shown that blocking the release of Ca<sup>2+</sup>  
75 from intracellular stores using cell permeable Ca<sup>2+</sup> chelators blocks egress in malaria  
76 parasites (17-19). It has been suggested that this release of Ca<sup>2+</sup> into the cytoplasm  
77 comes from the parasite ER; however, the parasite genome lacks identifiable orthologs  
78 of ligand-gated Ca<sup>2+</sup> channels such as the inositol 1,4,5,-triphosphate or ryanodine  
79 receptors (20). Increase in cytoplasmic Ca<sup>2+</sup> is thought to activate calcium dependent  
80 protein kinases (CDPKs) resulting in release of egress-related vesicles (16, 21).

81 In malaria parasites, these egress-related vesicles contain specific proteases that  
82 are proteolytically processed and activated, perhaps upon release into the PV (22-24).

83 For example, one such pivotal enzyme is the serine protease, Subtilisin 1 (SUB1), which  
84 undergoes two cleavage events. First, the zymogen undergoes  $\text{Ca}^{2+}$  dependent  
85 autoprocessing in the ER (25, 26) and then, it is cleaved again by the recently identified  
86 aspartic protease, Plasmepsin X (PMX), probably during its secretion into the PV (23, 24).  
87 The proteolytic cleavage and activation of SUB1 is understood to be the point of no-return  
88 as the release of SUB1 into the PV results in the rapid (~10 minutes) breakdown of the  
89 parasitophorous vacuole membrane (PVM) (22, 27). Then, substrates of SUB1 such as  
90 merozoite surface protein 1 (MSP1) and serine-repeat antigen 6 (SERA6) help  
91 breakdown the RBC cytoskeleton and the RBC membrane (RBCM) (28, 29). Once egress  
92 is completed, the merozoites subsequently invade fresh RBCs to start the cycle again.  
93 Like egress, invasion requires specific secretory events such as fusion of micronemes to  
94 the merozoite membrane and secretion of rhoptry contents into the host cell, which  
95 provides the ligand-receptor pair essential for driving the parasite into the host cell (30,  
96 31).

97 The parasite endoplasmic reticulum (ER) is thought to play a key role in egress  
98 and invasion of daughter merozoites. The putative functions of the parasite ER during  
99 these lifecycle stages, include biogenesis of the specific egress and invasion related  
100 organelles, transporting proteins to these organelles, and propagating  $\text{Ca}^{2+}$  signals  
101 essential for egress and invasion (32, 33). However, none of the proteins responsible for  
102 these ER-related functions during egress and invasion of apicomplexan parasites have  
103 been identified. We hypothesized that an ER-resident calcium binding protein (ERC) that  
104 is conserved in both *P. falciparum* (PfERC: PF3D7\_1108600) and *T. gondii* (TgERC:  
105 TGME49\_229480) plays a role in the  $\text{Ca}^{2+}$  signaling function of the parasite ER. In malaria  
106 parasites, this protein has been shown to bind calcium (34). However, the biological  
107 function of ERC is unknown in either apicomplexan parasite.

108 To address this, we used a ribozyme-based conditional knockdown system to  
109 study the role of PfERC in the asexual lifecycle *P. falciparum*, and we used a knock-out  
110 approach to study the role of TgERC in the biology of *T. gondii*. We characterized the role  
111 of both  $\text{Ca}^{2+}$  binding proteins, PfERC and TgERC, and propose a model for their potential  
112 roles in  $\text{Ca}^{2+}$  signaling and in the life cycle of both parasites. This is the first ER resident

113 protein identified in *P. falciparum* that is critical for the egress of malaria parasites from  
114 human red blood cells.

115

## 116 **Results**

### 117 PfERC and TgERC are EF-hand containing proteins localized in the ER

118 PfERC (PF3D7\_1108600) and TgERC (TgME49\_229480) are proteins related to  
119 the CREC (Calumenin, Reticulocalbin 1, ERC-55, Cab-45) family of proteins, which are  
120 characterized by the presence of multiple EF-hands and localize in various parts of the  
121 secretory pathway (35) (Figure 1A and Supplementary Figure 1). Like CREC members in  
122 other organisms, both PfERC and TgERC contain a signal peptide, multiple EF-hands,  
123 and an ER-retention signal (Figure 1A). However, TgERC differs from its *Plasmodium*  
124 homolog in that it only contains 5 EF-hands while PfERC contains an extended C-  
125 terminus that may contain a 6<sup>th</sup>, though degenerate, EF-hand (residues 314-325)  
126 (Supplementary Figure 1) (34). Since both proteins have an ER-retention signal they are  
127 predicted to reside within the lumen of the ER.

128

### 129 Generating conditional mutants of PfERC

130 In order to determine the biological role of PfERC, we used CRISPR/Cas9 gene  
131 editing to generate mutant parasite lines where the endogenous locus of PfERC was  
132 tagged with the conditional knockdown system employing the inducible ribozyme *glmS* or  
133 the inactive version of the ribozyme, *M9* (termed PfERC-*glmS* and PfERC-*M9*  
134 respectively) (Figure 1B and 1C) (36). Western blot and PCR analysis of PfERC-*glmS*  
135 and PfERC-*M9* parasite clones from two independent transfections demonstrate the  
136 correct insertion of the HA tag and the *glmS/M9* ribozymes at the PfERC locus (Figure  
137 1D and 1E). Co-localization of PfERC with an ER marker also confirmed its sub-cellular  
138 localization to this organelle (Figure 1F).

139

### 140 PfERC is essential for asexual growth and for schizont to ring transition

141 To determine if PfERC was essential for intraerythrocytic survival, we grew  
142 asynchronous PfERC-*glmS* and PfERC-*M9* parasites in the presence of glucosamine  
143 (GlcN), which activates the *glmS* ribozyme leading to mRNA cleavage (Figure 1B).

144 Western blot analysis shows that this leads to a reproducible reduction of PfERC  
145 expression in PfERC-*glmS* parasites while there is no reduction of protein levels in  
146 PfERC-*M9* parasites grown under identical conditions (Figure 2A-B). Importantly, this  
147 reduction in PfERC levels inhibited the asexual expansion of PfERC-*glmS* parasites,  
148 while there was no effect on the growth of PfERC-*M9* parasites (Figure 2C). The response  
149 of PfERC-*glmS* parasites was dose-dependent upon GlcN (Supplementary figure 2A)

150 Since our data show that PfERC was essential for growth within the host RBC, we  
151 used synchronous parasites to determine which asexual stage was affected by  
152 knockdown. We added GlcN to synchronized schizonts and took blood smears at regular  
153 intervals during the intraerythrocytic life cycle to detect morphological development of the  
154 asexual stages (Figure 2D). Our data show that all intracellular stages developed  
155 normally in both PfERC-*glmS* and PfERC-*M9* parasites grown with GlcN (Figure 2D and  
156 Supplementary Figure 2B). However, 55hrs after addition of GlcN, the PfERC-*glmS*  
157 parasites remained either as morphologically normal schizonts or were observed as  
158 daughter merozoites in the extracellular space as well as some that were attached to  
159 RBCs (Figure 2D). On the other hand, PfERC-*M9* parasites were able to egress and re-  
160 invade fresh RBCs and developed into ring stage parasites (Figure 2D and  
161 Supplementary figure 2B).

162 These data suggest that the knockdown of PfERC resulted in a defect in the  
163 conversion from schizonts to rings. Therefore, we induced knockdown and observed the  
164 conversion of schizonts into rings via flow cytometry at 44, 48, and 56 h post-addition of  
165 GlcN. The data show that over the course of 12 hours, PfERC-*M9* parasites transitioned  
166 from schizonts to rings as determined by the ring:schizont ratio while PfERC-*glmS*  
167 parasites were unable to convert from schizonts into rings resulting in a drastically  
168 reduced ratio (Figure 2E). These data show that there was a delay in the disappearance  
169 of the morphologically normal PfERC-*glmS* schizonts over the final few hours of the  
170 asexual life cycle compared to PfERC-*M9* schizonts, suggesting that knockdown of  
171 PfERC led to a defect in egress (Figure 2F and 2G). Consequently, the delayed egress  
172 may lead to reduced numbers of ring stage parasites in PfERC-*glmS* parasites unlike  
173 PfERC-*M9* parasites (Figure 2F and 2H).

174

175 PfERC is required for PVM breakdown

176 Egress of daughter merozoites from the infected RBC is an ordered and rapid  
177 process where the PVM breakdown precedes the disruption of RBCM (Figure 3A).  
178 Therefore, we analyzed how egress of PfERC-*glmS* parasites was failing during  
179 knockdown. We took synchronized PfERC-*glmS* and PfERC-*M9* schizonts and initiated  
180 knockdown with addition of GlcN. These schizonts were allowed to reinvade fresh RBCs  
181 and proceed through the asexual stages for 48 hours until they developed into schizonts  
182 again. Then, these second cycle schizonts were incubated with inhibitors that block key  
183 steps during egress of *P. falciparum* (Figure 3A). To ensure synchronized egress, we  
184 used reversible inhibitors of PKG, Compound 1 (C1) or Compound 2 (C2), because  
185 inhibition of PKG allows merozoites to develop normally but prevents them from initiating  
186 egress (Figure 3A) (10, 15). We used flow cytometry to observe PfERC-*glmS* and PfERC-  
187 *M9* schizonts after washing off C1 and saw that there was a delay in the egress of PfERC-  
188 *glmS* schizonts while the majority (>60%) of the PfERC-*M9* schizonts were able to  
189 complete egress within two hours after washout of C1 (Figure 3B). Removal of C1 initiates  
190 the breakdown of the PVM followed by RBCM rupture (Figure 3A), suggesting that  
191 PfERC-*glmS* parasites fail to breach one of these membranes down despite removal of  
192 the PKG inhibitor.

193 Therefore, we tested whether PfERC knockdown prevented rupture of PVM or if  
194 PfERC functioned during RBCM breakdown (Figure 3A). PfERC-*glmS* and PfERC-*M9*  
195 schizonts (where knockdown had been initiated in the previous cycle) were incubated  
196 with C2 (10, 15) and observed by scanning electron microscopy (SEM) (Figure 3A and  
197 3C). We observed that parasites treated with C2 were morphologically identical and had  
198 developed into mature schizonts within the PVM inside the RBC (Figure 3C). Then, we  
199 washed C2 from the parasites and observed these schizonts after 30 mins by SEM  
200 (Figure 3C). During this time period, PfERC-*M9* schizonts were able to initiate egress  
201 after removal of C2 and we observed free merozoites attached to the RBC as well as  
202 clusters of merozoites that had broken out of the PVM but were contained by a collapsed  
203 RBCM wrapped around them (Figure 3C). In contrast, the PfERC-*glmS* schizonts were  
204 still stuck within the RBC and looked identical to the C2 arrested schizonts, suggesting  
205 that they had not initiated egress even though PKG was no longer inhibited (Figure 3C).



206 These data suggest that knockdown of PfERC blocks egress at an early step, perhaps  
207 blocking the rupture of the PVM (Figure 3C).

208 We directly observed if breakdown of the PVM was impacted by knockdown of  
209 PfERC using transmission electron microscopy (TEM) (Figure 3D). Knockdown was  
210 induced by adding GlcN to PfERC-*gImS* and PfERC-*M9* schizonts and these parasites  
211 were allowed to go through one asexual cycle and develop into schizonts again 48hrs  
212 later. These schizonts were prevented from completing egress using the irreversible  
213 cysteine protease inhibitor, E64 (Figure 3A). This inhibitor blocks the breakdown of the  
214 RBCM but allows both the breakdown of PVM and poration of the RBCM, which results  
215 in the loss of the electron dense contents of the infected RBC (Figure 3A) (15, 29, 37).  
216 Our results show that the PfERC-*M9* schizonts were able to break down the PVM as well  
217 as proceed with the poration of the RBCM after an 8-hour incubation with E64, while the  
218 PfERC-*gImS* mutants were unable to proceed through the first step of egress and failed  
219 to rupture the PVM (Figure 3D). Overall, these data demonstrate that PfERC function is  
220 critical for the breakdown of the PVM (Figure 3C and 3D).

221

### 222 Generating knockouts of TgERC

223 We hypothesized that the ortholog of PfERC in the related apicomplexan parasite,  
224 *T. gondii*, may play a similar in the egress of this parasite from its host cell. Therefore, we  
225 studied the biological role of TgERC by disrupting the transcription of the *tgerc* gene using  
226 CRISPR/Cas9 gene editing to insert the selection marker gene, dihydrofolate reductase  
227 (DHFR), in the *tgerc* locus (38, 39) (Figure 4A). Insertion of this gene into the *tgerc* locus  
228 interfered with the synthesis of the correct transcript and allowed the selection of clonal  
229 populations with pyrimethamine. The mutant  $\Delta tgerc$  was isolated by limiting dilution, and  
230 a PCR product of 6.1 kb obtained from the mutant parasites DNA indicated the insertion  
231 of the marker in the predicted locus (Figure 4B). This fragment was only amplified from  
232 DNA of mutants while a fragment of 2.9kb was amplified from parental cells, which  
233 correspond to the intact locus of *tgerc* (Figure 4B).

234 In order to verify the localization of TgERC, we cloned and expressed TgERC in  
235 *E. coli* and the purified recombinant protein to immunize mice for the generation of specific  
236 antibodies. Western blot analysis using this antibody showed the presence of a ~38kDa



237 band corresponding to TgERC in the parental (RH) parasites but absent in the *Δtgerc*  
238 mutants (Figure 4C). Furthermore, IFAs using this antibody showed that TgERC localized  
239 predominantly to the endoplasmic reticulum in both extracellular and intracellular  
240 tachyzoites (Figure 4D).

241

#### 242 TgERC is required for Ca<sup>2+</sup> storage but PfERC is not

243 To determine whether TgERC was essential for the lytic cycle of the parasites, we  
244 performed plaque assays comparing growth of RH wild type with *Δtgerc* (Figure 4E). Our  
245 data show that the mutant parasites were able to form plaques about the same size as  
246 the controls (Figure 4F). These data suggest that unlike PfERC, TgERC was not required  
247 for egress from the host cell nor was it essential for the lytic cycle of *T. gondii*.

248 We next tested the if TgERC had any role in the storage of Ca<sup>2+</sup> by testing for  
249 increases in cytoplasmic Ca<sup>2+</sup> in response to thapsigargin. This inhibits the SERCA-  
250 Ca<sup>2+</sup> ATPase, exposing leakage of Ca<sup>2+</sup> from the ER into the cytoplasm as detected by  
251 fluorescence changes in parasites loaded with the Ca<sup>2+</sup> indicator Fura-2AM (Figure 4G-  
252 J) (40, 41). We observed that the cytoplasmic Ca<sup>2+</sup> increase in the *Δtgerc* mutants after  
253 adding thapsigargin was not significantly different than the response obtained under  
254 identical conditions when using wild type parasites (Figure 4G). However, when we  
255 performed the same experiment in the presence of extracellular Ca<sup>2+</sup> (Figure 4I), the  
256 response to thapsigargin in *Δtgerc* tachyzoites was significantly reduced. The reduced  
257 response in the *Δtgerc* parasites indicates that the ER of these parasites is unable to  
258 store Ca<sup>2+</sup> as efficiently as the wild type. This indicates that TgERC is part of the ER  
259 machinery involved in storing Ca<sup>2+</sup>. However, it is evident that other mechanisms are in  
260 play since the parasites are still able to grow normally (Figure 4E-F).

261 Since knockout of TgERC resulted in defects in Ca<sup>2+</sup> storage in the ER of *T. gondii*  
262 (Figure 4I and 4J), we hypothesized that PfERC is required for egress because it plays a  
263 similar role in *P. falciparum* and does not have redundant mechanisms like *T. gondii* that  
264 compensate for the lack of TgERC. To test this hypothesis, synchronized PfERC-*gImS*  
265 and PfERC-*M9* schizonts were incubated with GlcN and allowed to proceed through one  
266 asexual cycle until they formed schizonts again. The second cycle schizonts were isolated  
267 using saponin lysis and loaded with Fluo-4AM to measure cytosolic Ca<sup>2+</sup> (Supplementary

268 Figure 3A). To assess if the storage of  $\text{Ca}^{2+}$  in the ER of the parasite was affected by  
269 knockdown of PfERC, we added the SERCA- $\text{Ca}^{2+}$  ATPase inhibitor Cyclopiazoic acid  
270 (CPA) to these saponin-isolated parasites (Supplementary Figure 3A and 3B) (42).  
271 Inhibiting the SERCA- $\text{Ca}^{2+}$  ATPase allows  $\text{Ca}^{2+}$  stored in the ER to leak into the  
272 cytoplasm, which results in a detectable change in the fluorescence of Fluo-4AM  
273 (Supplementary Figure 3B). Our measurements show that there was no difference in the  
274 amount of  $\text{Ca}^{2+}$  that leaked from the parasite ER, upon SERCA- $\text{Ca}^{2+}$  ATPase inhibition,  
275 between PfERC-*glmS* and PfERC-*M9* schizonts (Supplementary Figure 3B).

276 To test if there was a defect in  $\text{Ca}^{2+}$  storage in neutral stores, we used the  
277 ionophore, Ionomycin, which releases  $\text{Ca}^{2+}$  from all neutral stores in the cell and  
278 measured the release of  $\text{Ca}^{2+}$  into the cytoplasm of PfERC-*glmS* and PfERC-*M9*  
279 schizonts. The parasites were isolated as described above and the changes in  
280 cytoplasmic  $\text{Ca}^{2+}$  were measured using Fluo-4AM (Supplementary Figure 3A and 3C).  
281 Again, we did not observe any difference in the amount of  $\text{Ca}^{2+}$  released into the  
282 cytoplasm of PfERC-*glmS* and PfERC-*M9* schizonts treated with ionomycin  
283 (Supplementary Figure 3C). These data suggest that the availability of free  $\text{Ca}^{2+}$  in the  
284 ER of *P. falciparum* is not affected by knockdown of PfERC. Furthermore, these data  
285 suggest that the observed egress defect upon PfERC knockdown was not a result of  
286 disequilibrium of  $\text{Ca}^{2+}$  in the parasite ER.

287

### 288 Efficient SUB1 activation requires PfERC

289 Electron microscopy data show that knockdown of PfERC prevents the breakdown  
290 of the PVM (Figure 3). A key event required for PVM breakdown is the proteolytic  
291 processing of SUB1, which starts a cascade that ends in the release of merozoites from  
292 the infected RBC (22, 29). Therefore, we tested if knockdown of PfERC affects processing  
293 of PfSUB1. This protease is processed twice, once in the ER, where it undergoes a  $\text{Ca}^{2+}$ -  
294 dependent autocatalytic processing from its zymogen form (83-kDa) into a 54-kDa semi-  
295 proenzyme form (p54) (25, 26, 43). From the ER, SUB1 is transported to the egress-  
296 related secretory vesicles, the exonemes, which are secreted into the PV to initiate  
297 breakdown of the PV membrane. It is proposed that during secretion of SUB1, it is  
298 processed by PMX from its semi-proenzyme form (p54) to its mature form (p47) (23, 24).

299 The secretion of mature p47 form of SUB1 initiates the breakdown of the PVM (22, 43).  
300 We hypothesized that PfERC is required for the first Ca<sup>2+</sup>-dependent autoprocessing of  
301 SUB1, in the ER, from the 82-kDa zymogen into the p54 semi-proenzyme.

302 To test this hypothesis, PfERC-*glmS* and PfERC-*M9* schizonts were incubated with  
303 GlcN and allowed to progress through one asexual growth cycle (48 hours) to develop  
304 into schizonts again. Lysates from these synchronized schizonts were separated on a  
305 Western blot and probed with antibodies against SUB1 (Figure 5A and Supplementary  
306 Figure 4A). No change was observed in the Ca<sup>2+</sup>-dependent autoprocessing of the  
307 zymogen-form of SUB1 into the semi-proenzyme (p54) form (Figure 5A and  
308 Supplementary Figure 4A). Surprisingly, we observed a reproducible and significant  
309 decrease in the processing of SUB1 from p54 to the p47 form in PfERC-*glmS* parasites  
310 (Figure 5A and 5B). Compared to PfERC-*M9* parasites, there was a >50% decrease in  
311 the amount of processed SUB1 (p47) in PfERC-*glmS* parasites (Figure 5B). These data  
312 suggest that PfERC is required for the secretion-dependent processing of SUB1 in  
313 exoneme vesicles.

314 Since we observed the presence of some mature SUB1 in PfERC-*glmS* parasites  
315 (Figure 5A), we tested if the activity of SUB1 was affected upon knockdown of PfERC by  
316 assaying for the processing of a known substrate of SUB1, the merozoite surface protein  
317 1 (MSP1). MSP1 is required for the initial attachment of merozoites onto RBCs and it has  
318 been shown that correct processing of MSP1, by SUB1, is also required for efficient  
319 egress as it plays a role in breakdown of the RBC cytoskeleton after release from the  
320 PVM (28, 44-46). Lysates from synchronized second-cycle PfERC-*glmS* and PfERC-*M9*  
321 schizonts, treated as above, were separated on a Western blot and probed using anti-  
322 MSP1 antibodies (Figure 5C and Supplementary Figure 4B). Our data show that there  
323 was a ~60% reduction in MSP1 processing in our PfERC-*glmS* parasites as compared to  
324 PfERC-*M9* parasites after knockdown (Figure 5C). In fact, we observed that PfERC-*glmS*  
325 schizonts had 3 times more unprocessed MSP1 in contrast to PfERC-*M9* schizonts  
326 (Figure 5D). These data reveal that knockdown of PfERC leads to defects in SUB1  
327 processing and activity, and consequently, MSP1 processing (Figure 5).

328

329 Knockdown of PfERC does not affect protein trafficking or organelle biogenesis

330 MSP1 is a GPI-anchored merozoite membrane protein that is presumably  
331 processed by SUB1 once the protease is secreted into the PV (28, 29). Therefore, we  
332 wanted to verify that knockdown of PfERC led to a specific defect in the egress cascade  
333 and is not due to a block in protein trafficking via the ER or defects in the biogenesis of  
334 egress and invasion related organelles. To address this, we used super resolution  
335 structured illumination microscopy (SR-SIM) to observe if there was a difference in the  
336 surface expression of MSP1 between PfERC-*glmS* and PfERC-*M9* schizonts upon  
337 knockdown of PfERC (Figure 5E). As before, knockdown was initiated in synchronized  
338 PfERC-*glmS* and PfERC-*M9* schizonts and after 48 hours, these schizonts were stained  
339 with anti-MSP1 antibodies. Our data shows that there was no difference in the trafficking  
340 of MSP1 to the surface of developing PfERC-*glmS* or PfERC-*M9* merozoites after  
341 knockdown (Figure 5E). In addition, we also tested whether the localization of other  
342 egress-and invasion-related proteins that traffic through the ER were affected after  
343 knockdown by staining similarly treated schizonts for the micronemal protein AMA1 and  
344 the rhoptry-bulb protein RAP1. Our data show that, again, there was no difference in the  
345 localization of these proteins in schizonts between PfERC-*glmS* and PfERC-*M9* parasites  
346 suggesting that the knockdown of PfERC does not cause a generalized defect in the  
347 secretory pathway (Figure 5F&G).

348 As the ER generates the lipid membranes required for generating organelles  
349 essential for egress and invasion, we wanted to see if their biogenesis was inhibited upon  
350 knockdown. If true, this could explain the processing defects that we observe for SUB1  
351 and MSP1. We observed E64-treated schizonts (Figure 3A) by transmission electron  
352 microscopy and these data show that both micronemes and rhoptries remain  
353 morphologically intact in both PfERC-*glmS* and PfERC-*M9* parasites after knockdown  
354 was induced (Figure 5H). Successful knockdown was confirmed by the lack of PVM  
355 membrane fragments in PfERC-*glmS* parasites, which are present in the PfERC-*M9*  
356 parasites, suggesting that PVM rupture occurred normally in the presence of PfERC but  
357 not when the protein is knocked down (Figure 5H). These data suggest that the  
358 knockdown of PfERC does not lead to defects in organelle biogenesis (Figure 3D and  
359 Figure 5H).

360

361 PfERC is required for invasion of merozoites

362 The synchronized growth assays suggest that knockdown of PfERC inhibits the  
363 invasion of merozoites into RBCs (Figure 2D, H and Figure 5C, D). To assess if invasion  
364 was reduced upon knockdown, PfERC-*glmS* and PfERC-*M9* schizonts in the second  
365 cycle after 48 hours in GlcN, were incubated with the PKG inhibitor, C1, for four hours  
366 (Figure 3A). The inhibitor was then washed off and the formation of ring stages was  
367 observed over two hours by flow cytometry (Figure 6A). We observed that there was a  
368 delay in the formation of ring stages as well as a drastic decrease in the numbers of ring  
369 stage parasites formed in PfERC-*glmS* parasites compared to the PfERC-*M9* control  
370 (Figure 6A). This could be due to loss of egress or could be a combination of effects on  
371 egress and invasion due to PfERC knockdown.

372 To decouple the egress and invasion phenotypes, we directly measured the  
373 efficiency of merozoite invasion (Figure 6B). This was accomplished by incubating second  
374 cycle PfERC-*glmS* and PfERC-*M9* schizonts with E-64 and then mechanically releasing  
375 the merozoites (Figure 6B) (47). Incubation with E-64 for 8 hours allows for the completion  
376 of schizogony and formation of invasion-competent merozoites. These purified  
377 merozoites were then allowed to invade fresh RBCs and the invasion rate was quantified  
378 using flow cytometry as described previously (Figure 6C) (47). These data show that there  
379 was a drastic reduction in the invasion efficiency of PfERC-*glmS* merozoites as compared  
380 to the control PfERC-*M9* merozoites, thus demonstrating that knockdown of PfERC led  
381 to a defect in invasion as well (Figure 6C).

382

383 PfERC knockdown affects proteolytic processing of AMA1

384 The reduced invasion of PfERC-*glmS* merozoites could be explained by the  
385 reduction in processing of MSP1, which is known to be required for the initial attachment  
386 of merozoites to the RBC (44, 45, 48). Invasion of RBCs by *P. falciparum* merozoites  
387 requires secretion of contents from another apical organelle, the rhoptries, into the RBC  
388 (49-51). Proteins in the rhoptries, like the rhotry-bulb protein, RAP1, require proteolytic  
389 processing for their activity (23, 24). Once in the rhoptry, RAP1 is processed by the  
390 aspartic protease, Plasmepsin IX (PMIX), from a pro-form (p83) to a mature form (p67)  
391 (23, 24, 52, 53). Therefore, we tested if RAP1 processing was affected by knockdown of

392 PfERC using Western blot analysis (Figure 6F and Supplementary Figure 4C). Our data  
393 show that the proteolytic processing of RAP1 was not affected by the knockdown of  
394 PfERC (Figure 6G), showing that knockdown does not lead to a generalized defect in the  
395 processing of all proteins that traverse through the secretory pathway.

396 Another key and essential step in invasion of merozoites is the formation of a tight  
397 junction between the parasite and the RBC and AMA1 is critical for the formation of this  
398 tight junction (30, 31). AMA1 is trafficked from micronemes to the merozoite surface and  
399 there it is processed from its pro-form (p83) to its mature form (p66) by an unknown  
400 protease (54-56). The proteolytic processing of AMA1 is critical for its function during  
401 invasion (57). Therefore, we tested if the processing of the AMA1 was affected upon  
402 knockdown of PfERC. As before, after initiating knockdown in synchronized schizonts,  
403 we separated lysates from second cycle PfERC-*glmS* and PfERC-*M9* schizonts on a  
404 Western blot and probed it with anti-AMA1 antibodies (Figure 6D and Supplementary  
405 Figure 4D). We observed a significant reduction in the proteolytic processing of AMA1  
406 upon knockdown (Figure 6D). Indeed, there was a >40% decrease in the processing of  
407 AMA1 in PfERC-*glmS* mutants compared to the PfERC-*M9* control (Figure 6E). These  
408 data suggest that PfERC is required for the correct processing of AMA1 and therefore,  
409 essential for invasion of merozoites into the host RBC.

410

## 411 Discussion

412 In this study, we addressed the biological role of a conserved Ca<sup>2+</sup>-binding protein  
413 that resides in the lumen of the ER of apicomplexan parasites. We have shown that the  
414 *Toxoplasma* homolog, TgERC, is dispensable for *in vitro* growth, and the *Plasmodium*  
415 homolog, PfERC, is essential for asexual replication (Figures 2 and 3). Our data show  
416 that knockdown of PfERC did not affect the ring and trophozoite development but had a  
417 clear effect on the subsequent schizont-to-ring transition (Figures 2D-H, 3B, 6A, and  
418 Supplementary Figure 2). Specifically, these data show that PfERC is required for both  
419 egress from infected RBCs (Figures 2D, 2G, and 3) and invasion into host erythrocytes  
420 (Figures 2D, 2H and 6A-C). This is consistent with data that suggest PfERC may be  
421 transcriptionally controlled by the invasion-specific transcription factor PfAP2-I (58). Our  
422 data show that knockdown of PfERC leads to defects in the processing of proteins critical



423 for invasion of merozoites into the host RBC, namely, MSP1 and AMA1 (Figures 5C-D  
424 and 6 D-E). However, the observed invasion defect is likely a secondary effect because  
425 several proteins critical for invasion are processed during egress (28, 29). Given the  
426 limitations of the conditional knockdown system, we cannot tease out a specific role for  
427 PfERC in invasion. As invasion occurs rapidly (<2mins), a potential specific invasion-  
428 related function of PfERC could be tested using a small molecule that specifically targets  
429 PfERC (59). Overall, these data show that PfERC is essential for egress of merozoites  
430 from the infected RBC and for invasion of merozoites into the host erythrocyte.

431 It has been observed previously that the mechanisms at play during egress of  
432 daughter parasites from the host cells differs between *Toxoplasma* and *Plasmodium*. This  
433 is highlighted by studies showing that orthologs of apicomplexan proteins can serve  
434 different functions in their respective organisms. For example, TgCDPK3 is required for  
435 egress of *T. gondii* tachyzoites while its *Plasmodium* ortholog, PfCDPK1, is essential for  
436 both egress and invasion (60). Similarly, another calcium dependent protein kinase,  
437 TgCDPK1, plays a vital role in egress and invasion of *Toxoplasma* tachyzoites but the  
438 *Plasmodium* ortholog, PfCDPK4, was shown to be required for the development of sexual  
439 stages (60). Additionally, TgSUB1 localizes to micronemes and is used for processing of  
440 micronemal proteins that are required for invasion of *T. gondii* into host cells (61).  
441 However, PfSUB1 is critical for egress of *Plasmodium* merozoites, localizes to exonemes,  
442 and upon secretion into the PV, processes both micronemal and non-micronemal proteins  
443 (22, 62). These differences could be related to their development within different host  
444 cells. *Plasmodium* prefers the erythrocyte for its asexual expansion and *Toxoplasma* is  
445 able to make its home within any nucleated cell. Another factor is the difference in the  
446 primary structure of TgERC and PfERC, which possesses an additional putative EF-hand  
447 domain compared to its homolog in *T. gondii*. Therefore, it is not surprising that the  
448 biological role of TgERC may be different from the function of PfERC. This was evident  
449 in the data that suggest that TgERC plays a role in ER Ca<sup>2+</sup> storage but PfERC may not  
450 (Figures 4I, 4J and Supplementary Figure 3). It is interesting to note that there are no  
451 orthologues of many Ca<sup>2+</sup> entry channels such as store-operated channels (ORAI), or  
452 their partners such as the ER sensor protein stromal interaction molecule (STIM) in the  
453 genome of apicomplexan parasites. Future work on identifying the interacting partners of



454 TgERC may provide some clues as to the identity of putative ER Ca<sup>2+</sup> sensors that could  
455 regulate the function Ca<sup>2+</sup> entry channels in these divergent parasites.

456 During the formation of daughter merozoites in schizonts, several key egress and  
457 invasion related organelles essential for propagation of the infection are generated. The  
458 ER is thought to play a key role in the biogenesis of these organelles and the ER is  
459 responsible for transporting the essential proteins to these organelles (32, 33). As an ER-  
460 resident protein, knockdown of PfERC could affect several ER functions such as protein  
461 trafficking, organellar biogenesis, and Ca<sup>2+</sup> signaling. Therefore, we tested if PfERC  
462 functions in the trafficking of proteins required for schizont to ring transition such as MSP1,  
463 AMA1, and RAP1. A defect in the secretory pathway would explain the observed  
464 deficiencies in the proteolytic processing of SUB1, MSP1 and AMA1, as transport out of  
465 the ER is required for their maturation (10, 26, 52, 63). However, super-resolution and  
466 electron microscopy experiments showed that trafficking of proteins to the merozoite  
467 surface, micronemes, and rhoptries or their biogenesis are not affected (Figures 3D and  
468 5E-5H). Likewise, Western blot analysis showed that the proteolytic processing of a  
469 rhoptry protein, RAP1, which is processed after transport to the organelle, is not affected  
470 by knockdown of PfERC (Figures 5G, and 6F-G) (23, 24). These data show that  
471 knockdown of PfERC does not result in a generalized defect in protein trafficking via the  
472 ER or in organelle biogenesis.

473 Immunofluorescence microscopy, electron microscopy, and Ca<sup>2+</sup> measurements  
474 ruled out a role for PfERC in Ca<sup>2+</sup> storage, protein trafficking, or organelle biogenesis  
475 (Figures 3D, 5E-G, 6F, 6G and Supplementary Figure 3). Another interesting possibility  
476 is that PfERC may play a role the signal-dependent release of Ca<sup>2+</sup> from the ER. PfERC  
477 is a member of the CREC family of proteins and other members of this family are known  
478 to play key roles in the function of ligand-gated Ca<sup>2+</sup> channels. For example, calumenin  
479 and reticulocalbin 1 have been shown to interact with the Ryanodine and IP<sub>3</sub> receptors,  
480 respectively, and regulate their function (64, 65). It has also been suggested that some  
481 CREC members serve as Ca<sup>2+</sup> sensors in the ER as they exhibit calcium-dependent  
482 structural changes (66, 67). This is difficult to test in *Plasmodium* since there are no clear  
483 homologs for a ligand-dependent Ca<sup>2+</sup> channel in its genome (20). At present, Ca<sup>2+</sup>  
484 measurements in *P. falciparum* require lysis of the RBCM that results in loss of the RBC

485 contents and this complicates any conclusions reached from egress-related experiments  
486 since it is unknown if components in the RBC are essential for the signaling pathway  
487 required for egress. However, this may be addressed by using less invasive approaches  
488 that do not require lysis of the RBCM such as genetically-encoded  $\text{Ca}^{2+}$  indicators (GECI)  
489 to measure changes in ER  $\text{Ca}^{2+}$  during egress or by studying the egress-related roles of  
490 proteins that interact with PfERC.

491 Consistent with a role for PfERC in signal-dependent release of  $\text{Ca}^{2+}$  from the ER,  
492 we observed that knockdown resulted in a clear defect in egress (Figures 2G, 3, and 5A-  
493 D). Egress is a rapid process and the genetic mechanisms in the ER of apicomplexan  
494 parasites that control the signal-dependent release of  $\text{Ca}^{2+}$  from the ER are unknown.  
495 Our data supports a model where PfERC functions in the signaling pathway that releases  
496  $\text{Ca}^{2+}$  from the ER required for the egress of merozoites from the infected RBC. This model  
497 would also predict that PfERC plays a role in the release of  $\text{Ca}^{2+}$  from the ER, such that  
498 in the absence of PfERC, the ER is unable to release  $\text{Ca}^{2+}$  upon the requisite signal. Such  
499 a putative role for PfERC is supported by data which show that knockdown of PfERC  
500 inhibits egress by preventing the breakdown of the PVM (Figure 3C-D).

501 A key enzyme that is required for initiating egress is the protease SUB1. Another  
502 hypothesis we tested was if PfERC was required for the  $\text{Ca}^{2+}$  dependent activity of SUB1.  
503 This serine proteases plays a critical role in disruption of both the PVM and RBCM. It is  
504 produced as an 82-kDa zymogen in the ER, where it rapidly self-processes into a 54-kDa  
505 semi-proenzyme that remains associated with the cleaved prodomain, thus inhibiting its  
506 activity (43). The autocatalytic activity of SUB1 is  $\text{Ca}^{2+}$  dependent and therefore, it was  
507 possible that PfERC was required for this autoprocessing event by providing the required  
508  $\text{Ca}^{2+}$  to SUB1. This would explain the phenotypes observed during knockdown of PfERC  
509 as they are similar to that seen when SUB1 is conditionally knocked out (29). However,  
510 our data show only the second processing step of SUB1 that produces the mature, active  
511 form of the protease (p54 to p47), is affected (Figure 5A-B and Supplementary Figure  
512 4A). There is no effect on the  $\text{Ca}^{2+}$  dependent autoprocessing of SUB1 (p83 to p54) that  
513 occurs in the ER (Figure 5A-B and Supplementary Figure 4A). The processing of SUB1  
514 from p54 to p47 occurs once it is trafficked out of the ER and putatively during secretion  
515 of exoneme vesicles (25). This processing defect reduces the activity of SUB1 as it is

516 defective in processing its substrate, MSP1 (Figure 5A-D). This processing event  
517 happens after the secretion of SUB1 into the PV as MSP1 is a GPI-anchored protein on  
518 the membrane of merozoites (28). These data suggest that PfERC is required for  
519 secretion of exonemes, which is consistent with a role for PfERC in signal-dependent  
520 release of Ca<sup>2+</sup> from the ER.

521 A principal finding of these studies is the identification of the first protein in the ER  
522 of *P. falciparum* with a specific role in egress of malaria parasites from RBCs and  
523 potentially in the invasion of parasites into the RBC (Figures 2, 3, 5 and 6). These studies  
524 lay the foundation for understanding the vital and key role that ER-resident proteins play  
525 in the egress of human malaria parasites from their infected RBC and their re-entry into  
526 the host cell. Some studies have suggested that a key class of antimalarials containing  
527 endoperoxides, which includes the frontline antimalarial artemisinin, may target PfERC  
528 (59) and one of the transcriptomic responses of artemisinin-resistant parasites is the  
529 overexpression of PfERC (68). These data suggest that targeting PfERC, and thus  
530 egress, is a viable strategy for antimalarial drug development.

531

## 532 **Material and Methods**

533 **Cell culture and transfections.** *Plasmodium* parasites were cultured in RPMI 1640  
534 medium supplemented with Albumax I (Gibco) and transfected as described earlier (69-  
535 72). *T. gondii* tachyzoites were maintained in vitro by serial passage in Dulbecco's  
536 modified minimal essential media (DMEM) with 1% FBS, 2.5 µg/ml amphotericin B, and  
537 100 µg/ml streptomycin. Host cells were human telomerase reverse transcriptase  
538 immortalized foreskin fibroblasts (hTERT) (73).

539 To generate PfERC-*gImS* and PfERC-*M9* parasites, a mix of two plasmids (50µg  
540 of each) was transfected in duplicate into 3D7 parasites. The plasmid mix contained  
541 pUF1-Cas9-guide (74) which contains the DHOD resistance gene, and pPfERC-HA-  
542 SDEL-*gImS* or pPfERC-HA-SDEL-*M9*, which are marker-free. Drug pressure was applied  
543 48hrs after transfection, using 1µM (DSM1) (75), selecting only for Cas9 expression.  
544 DSM1 was then removed from the culturing medium once the parasites were detected in  
545 the culture, around 3 weeks post-transfection.

546 The  $\Delta tgerc$  knock-out line was generated by inserting the dihydrofolate reductase  
547 (DHFR) gene into the first ~300 nucleotides of the *tgerc* gene to disrupt the coding  
548 sequence. The CRISPR/Cas9 gene knockout method previously reported was used (39).  
549 A fragment corresponding to the single guide RNA (sgRNA) using primers 1+2 was  
550 cloned into pSAG1:CAS9::U6:sgUPRT (Addgene #54467) using the Q5 site-directed  
551 mutagenesis kit (NEB). The resulting pSAG1:CAS9::U6:sgTgERC was co-transfected  
552 with the DHFR cassette (in proportion 3:1) using primers 3+4 to tachyzoites of the RH  
553 strain. After pyrimethamine selection (1  $\mu$ M), parasites were sub-cloned by limiting dilution  
554 and screened for positive clones by PCR using primers 5+6 shown in Table S1.

555

556 **Construction of PfERC plasmids.** Genomic DNA was isolated from *P. falciparum*  
557 cultures using the QIAamp DNA blood kit (Qiagen). Constructs utilized in this study were  
558 confirmed by sequencing. PCR products were inserted into the respective plasmids using  
559 the In-Fusion cloning system (Clontech), the sequence- and ligation-independent cloning  
560 (SLIC) method (71, 72), T4-ligation (New England BioLabs), or site-directed mutagenesis  
561 using QuickChange (Agilent). To generate the pHA-SDEL-*glmS/M9* plasmid, primers 7+8  
562 were used to add an SDEL sequence at the end of the HA tag in pHA-*glmS* and pHA-*M9*  
563 plasmids (71, 72).

564 For the generation of the PfERC-*glmS/M9* conditional mutants, pHA-SDEL-  
565 *glmS/M9* plasmid was used as a donor DNA template consisting of two homology regions  
566 flanking the HA-SDEL tag and the *glmS* or *M9* sequence. To allow efficient genomic  
567 integration of the pHA-SDEL-*glmS* and pHA-SDEL-*M9* donor plasmids, 800-bp  
568 sequences were used for each homology region. The C-terminus of the *pferc* coding  
569 region was PCR amplified from genomic DNA using primers 9+10 (containing the shield  
570 mutation) and was inserted into pHA-SDEL-*glmS* and pHA-SDEL-*M9* using restriction  
571 sites SacII and AfeI. The 3'UTR of *pferc* was PCR amplified from genomic DNA using  
572 primers 11+12 and was inserted into pHA-SDEL-*glmS* and pHA-SDEL-*M9* (already  
573 containing the C-terminus region) using restriction sites HindIII and NheI. For expression  
574 of PfERC guide RNA, oligos 13+14 were inserted into pUF1-Cas9-guide as previously  
575 described (74, 76). Briefly, pUF1-Cas9-guide was digested with BtgZI and annealed

576 oligos were inserted using the SLIC method. Primers 9+12 and primers 9+15 (which  
577 recognizes the *glmS/M9* sequence) were used for clone verification.

578

579 **Plasmodium growth assays.** Asynchronous growth assays were done as described  
580 previously (71, 72). Briefly, 5mM glucosamine (GlcN) (Sigma) was added to the growth  
581 medium and parasitemia was monitored every 24hrs via flow cytometry using a CyAn  
582 ADP (Beckman Coulter) or CytoFLEX (Beckman Coulter) instrument and analyzed by  
583 FlowJo software (Treestar, Inc.). As required, parasites were subcultured to avoid high  
584 parasite density, and relative parasitemia at each time point was back-calculated based  
585 on actual parasitemia multiplied by the relevant dilution factors. One hundred percent  
586 parasitemia was determined as the highest relative parasitemia and was used to  
587 normalize parasite growth. Data were fit to exponential growth equations using Prism  
588 (GraphPad Software, Inc.).

589 To determine the ring:schizont ratio of PfERC-*glmS* and PfERC-*M9* parasites,  
590 7.5mM GlcN was added to percoll isolated schizont-stage parasites and parasites were  
591 allowed to egress and reinvade fresh RBCs. Two hours later, 5% sorbitol +7.5mM GlcN  
592 was added to the invaded culture to lyse any remaining schizonts and isolate two-hour  
593 rings. The ring-stage parasites were grown again in media supplemented with GlcN. Then  
594 samples were taken at 44hrs, 48hrs, and 56hrs, and read by flow cytometry to determine  
595 the population of rings and schizonts present at those times using FlowJo software  
596 (Treestar, Inc.). To determine the development of each life cycle stage during the asexual  
597 lifecycle of PfERC-*glmS* and PfERC-*M9* parasites, 7.5mM was added to percoll isolated  
598 schizont-stage parasites and parasites were allowed to egress and reinvade fresh RBCs.  
599 Time points were then taken by blood smears and the percentage of the specific lifecycle  
600 stage was calculated as:  $\% \text{ of stage} = \frac{\text{number of specific stage}}{\text{total number of parasites}}$ . Time 0hr is when GlcN was  
601 added. To determine the % amount of egressing or invading parasites, we took the %  
602 values of schizonts or rings at 44hrs and subtracted that number from % values of  
603 schizonts or rings at 12hrs later.

604 For growth assays using Compound 1, synchronized schizonts were grown with  
605 7.5mM GlcN for about 48hrs. Then, schizonts were percoll isolated and incubated with  
606 Compound 1 for 4hrs and then removed by gently washing parasites twice with 1mL of

607 warm, complete RPMI. Parasites were resuspended with fresh media and RBCs and  
608 samples were taken and read by flow cytometry. DNA content was determined using  
609 Hoechst staining (ThermoFisher).

610

611 **Plaque assays.** Plaque assays were done as previously described (77). Two hundred  
612 freshly egressed tachyzoites were used to infect a confluent monolayer of hTERT  
613 fibroblasts followed by 7 days of growth. Monolayers were fixed and stained with 5x  
614 crystal violet. Plaque sizes were analyzed with FIJI by measuring the area of fifteen  
615 plaques per biological replicate. At least 3 biological experiments were done for wild type  
616 control RH and TgERC knockout.

617

618 **Generation of TgERC antibody.** The *tgerc* gene (TgGT1\_229480) was identified from  
619 ToxoDB. Total RNA of the wild type strain (RH) was extracted from freshly lysed parasites  
620 using Trizol® reagent (Sigma) following the manufacturer's instructions. The RNA sample  
621 was further treated with DNase I for 10 min at 37 °C (New England Biolabs) to remove  
622 contaminating DNA. Four micrograms of purified mRNA were used to synthesize cDNA  
623 using the superscript III first-strand synthesis system according to the manufacturer's  
624 protocol (ThermoFisher Scientific-Life Technologies). *T. gondii* cDNA was used as a  
625 template for amplifying the *tgerc* gene (~ 1 Kb) with the primers 16+17 (Table S1). The  
626 PCR product was gel purified and cloned using the pET32 Ek/LIC vector system  
627 (Novagen). The construct was sequenced and transformed into *E. coli* BL21(DE3)-  
628 CodonPlus. Expression of the TgERC protein was induced for 3 h at 37°C with 0.4 mM  
629 isopropyl-β-D-thiogalactopyranoside (IPTG). Cells were pelleted and resuspended in  
630 equilibration/binding buffer (50 mM Na<sub>3</sub>PO<sub>4</sub>, 300 mM NaCl, 10 mM Imidazole, and 1:500  
631 protease inhibitor cocktail P-8849). Cells were then sonicated on ice for 80 seconds total  
632 with amplitude set to 30% (Branson Digital Sonifier Model 250) and centrifuged at 12,000  
633 rpm at 4°C for 20 min. The supernatant was filtered through a 0.45 μm cellulose acetate  
634 filter (VWR) and the protein was purified using HisPur Ni-NTA chromatography following  
635 instructions from the manufacturer. Unbound proteins were washed off with a total volume  
636 of 12 ml of wash buffer (50 mM Na<sub>3</sub>PO<sub>4</sub>, 300 mM NaCl and 20 mM Imidazole) and the



637 TgERC recombinant protein was eluted with 5 ml of elution buffer (50 mM Na<sub>3</sub>PO<sub>4</sub> ,300  
638 mM NaCl and 250 mM Imidazole). Elution fractions were verified by SDS-PAGE.

639 Antibodies against the TgERC recombinant protein were generated in mice. Six  
640 CD-1 mice (Charles River, Inc.) were intraperitoneally injected with 100 µg of purified  
641 TgERC recombinant protein mixed 1:1 with complete Freund adjuvant. Mice were  
642 boosted twice with 50 µg of antigen and the final serum was collected by cardiac puncture  
643 after CO<sub>2</sub> euthanasia (IACUC protocol A2018 02-021-Y1-A0)

644

645 **Western blotting.** Western blotting for *Plasmodium* parasites was performed as  
646 described previously (71, 72). Briefly, parasites were permeabilized selectively by  
647 treatment with ice-cold 0.04% saponin in PBS for 10 min and pellets were collected for  
648 detection of proteins with the parasite. For detection of MSP1, schizonts were isolated on  
649 a Percoll gradient (Genesee Scientific) and whole-cell lysates were generated by  
650 sonication. The antibodies used in this study were rat anti-HA (3F10; Roche, 1:3,000),  
651 rabbit anti-HA (715500; Invitrogen, 1:100), rabbit anti-PfEF1α (from D. Goldberg,  
652 1:2,000), mouse anti-plasmeprin V (from D. Goldberg, 1:400), rabbit anti-SUB1 (from Z.  
653 Dou and M. Blackman, 1:10,000), rat anti-AMA1 (28G2; Alan Thomas via BEI Resources,  
654 NIAID, NIH 1:500), mouse anti-MSP1 (12.4; European Malaria Reagent Repository,  
655 1:500) and mouse anti-RAP1 (2.29; European Malaria Reagent Repository, 1:500). The  
656 secondary antibodies that were used are IRDye 680CW goat anti-rabbit IgG and IRDye  
657 800CW goat anti-mouse IgG (LICOR Biosciences) (1:20,000). The Western blot images  
658 were processed using the Odyssey Clx LICOR infrared imaging system software (LICOR  
659 Biosciences). Calculation of knockdown and processing ratios was determined by both  
660 the Odyssey infrared imaging system software and ImageJ 1.8 (NIH).

661 For *T. gondii*, lysates were prepared by resuspending a pellet of 1 x 10<sup>8</sup> tachyzoites  
662 in 50 µl of Cell Lytic<sup>M</sup> lysis buffer containing 12.5 U benzonase and 1X protease cocktail  
663 inhibitor (P8340 Sigma). The reaction was stopped with one volume of 2% SDS and 1  
664 mM EDTA. Total lysates were boiled in Laemmli sample buffer (BioRad) (78).  
665 Immunoblots were done following established protocols using polyclonal mouse anti-  
666 TgERC serum (1:1,000). The Odyssey Clx LICOR system was used for detection, and  
667 the secondary antibody was goat anti-mouse IRDye 800WC (1:10,000).



668

669 **Immunofluorescence microscopy.** For IFAs, cells were fixed as described previously  
670 (71, 72). The antibodies used for IFA were: rat anti-HA antibody (clone 3F10; Roche,  
671 1:100), rat anti-PfGRP78 (MRA-1247; BEI Resources, NIAID, NIH 1:100), mouse anti-  
672 MSP1 (12.4; European Malaria Reagent Repository, 1:500), rat anti-AMA1 (28G2; Alan  
673 Thomas via BEI Resources, NIAID, NIH 1:500), and mouse anti-RAP1 (2.29; European  
674 Malaria Reagent Repository, 1:500). Secondary antibodies used were anti-rat antibody  
675 conjugated to Alexa Fluor 488 or 546 and anti-rabbit antibody conjugated to Alexa Fluor  
676 488, (Life Technologies, 1:100). Cells were mounted on ProLong diamond with 4',6'-  
677 diamidino-2-phenylindole (DAPI) (Invitrogen) and imaged using a Delta-Vision II  
678 microscope system with an Olympus IX-71 inverted microscope using a 100x objective  
679 or an Elyra S1 SR-SIM microscope (Zeiss, Jena, Germany). Image processing, analysis,  
680 and display were performed using SoftWorx or Axiovision and Adobe Photoshop.  
681 Adjustments to brightness and contrast were made for display purposes.

682 For *T. gondii* IFAs, extracellular parasites were collected and purified as previously  
683 described (77). Parasites were washed once with buffer A with glucose (BAG, 116 mM  
684 NaCl, 5.4 mM KCl, 0.8 mM MgSO<sub>4</sub>, 5.5 mM glucose and 50 mM HEPES, pH 7.4) and an  
685 aliquot with  $2 \times 10^4$  parasites was overlaid on a coverslip previously treated with poly-L-  
686 Lysine. Intracellular tachyzoites were grown on hTERT cells on coverslips previously  
687 infected with freshly lysed parasites. Both extracellular and intracellular parasites  
688 preparations were fixed with 2.5% paraformaldehyde for 20 min at room temperature  
689 (RT), permeabilized with 0.25% Triton X-100 and blocked with 3% bovine serum albumin  
690 (BSA). For co-localization studies parasites were exposed to primary antibodies mouse  
691 anti-TgERC 1:1000 and rabbit anti-GFP 1:800 after transfection with the P30-GFP-HDEL  
692 plasmid (79). The secondary antibodies were Alexa-Fluor488 goat-anti mouse and Alexa-  
693 Flour594 goat-anti rabbit at 1:1,000. Slides were examined using an Olympus IX-71  
694 inverted fluorescence microscope with a photometric CoolSNAP HQ charge-coupled  
695 device (CCD) camera driven by DeltaVision software (Applied Precision).

696

697 **Invasion Rate Quantification.** To calculate the invasion rate, parasites were treated as  
698 described previously (47). Briefly, 7.5mM GlcN was added to percoll isolated schizont-

699 stage parasites and parasites were allowed to egress and reinvade fresh RBCs. 48hrs  
700 later, schizonts were percoll purified and incubated with 20 $\mu$ M E-64 (Sigma) at 37°C in  
701 an incubator for 7-8hrs. Once incubation was done, merozoites were isolated by gently  
702 resuspending and passing the schizonts through a 1.2 $\mu$ m Acrodiscic Syringe Filter (PALL).  
703 Merozoites were spun at 2000xg for 5min, and then resuspended in 100 $\mu$ L of complete  
704 RPMI medium and added to a 1mL culture of uninfected RBCs at 2% hematocrit. Cultures  
705 were grown in a FluoroDish cell culture dish (World Precision Instruments) and gassed in  
706 a chamber for 20-24hrs. Invasion rate was then measured by the following equation:  $IR =$   
707  $iRBC \cdot \left[ \frac{RBC/\mu L}{Mz/\mu L} \right]$  where “*iRBC*” is the parasitemia 20-24hrs later, “*RBC/ $\mu$ L*” are the free  
708 RBCs used before addition of merozoites and “*Mz/ $\mu$ L*” are the merozoites found in the  
709 100 $\mu$ L suspension used before adding to fresh RBCs. Values for these variables were  
710 acquired by flow cytometry (CytoFLEX Beckman Coulter) with cells stained with acridine  
711 orange. The data were normalized using the IR values for PfERC-M9 merozoites as  
712 100%.

713

714 **Transmission Electron Microscopy.** 7.5mM GlcN was added to percoll isolated  
715 schizont-stage parasites and parasites were allowed to egress and reinvade fresh RBCs.  
716 48hrs later, parasites were percoll-isolated and then incubated with 20 $\mu$ M E-64 for 8hrs.  
717 After incubation, parasites were washed with 1X PBS and gently resuspended in 2.5%  
718 glutaraldehyde in 0.1M sodium cacodylate-HCl (Sigma) buffer pH 7.2 for 1hr at room  
719 temperature. Parasites were then rinsed in 0.1M Cacodylate-HCl buffer before agar-  
720 enrobing the cells in 3% Noble agar. Parasites were post fixed in 1% osmium  
721 tetroxide/0.1M Cacodylate-HCl buffer for 1 hour and rinsed in buffer and deionized water.  
722 Dehydration of the parasite samples was done with an ethanol series and then exposed  
723 to Propylene oxide before infiltration with Epon-Araldite. The blocks of parasites were  
724 trimmed, and sections were obtained using a Reichert Ultracut S ultramicrotome (Leica,  
725 Inc., Deerfield, IL). 60-70nm sections were placed on 200-mesh copper grids and post-  
726 stained with ethanolic uranyl acetate and Reynolds Lead Citrate. Grids were viewed with  
727 a JEOL JEM-1011 Transmission Electron Microscope (JEOL USA, Inc., Peabody, MA)  
728 using an accelerating voltage of 80 KeV. Images were acquired using an AMT XR80M

729 Wide-Angle Multi-Discipline Mid-Mount CCD Camera (Advanced Microscopy  
730 Techniques, Woburn, MA).

731

732 **Scanning Electron Microscopy.** 7.5mM GlcN was added to percoll isolated schizont-  
733 stage parasites and parasites were allowed to egress and reinvade fresh RBCs. 48hrs  
734 later, parasites were percoll-isolated and then incubated with 2 $\mu$ M Compound 2 for 4  
735 hours without shaking at 37°C in an incubator. After incubation, parasites were washed  
736 twice with warm, complete RPMI + 7.5mM GlcN. Samples were taken immediately after  
737 washing off Compound 2 and then 30min after and fixed as with TEM samples. Parasites  
738 were rinsed with 0.1M Cacodylate-HCl buffer before placing on glass coverslips prepared  
739 with 0.1% Poly-L-lysine. Parasites were allowed to settle onto the glass coverslips in a  
740 moist chamber overnight and then post fixed in 1% osmium tetroxide/0.1M Cacodylate-  
741 HCl buffer for 30 minutes. Cells on coverslips were rinsed three times in deionized water  
742 and then dehydrated with an ethanol series. The glass coverslips were critical point dried  
743 in an Autosamdri-814 Critical Point Dryer (Tousimis Research Corporation, Rockville,  
744 MD), mounted onto aluminum pin stubs with colloidal paint, and sputter coated with gold-  
745 palladium with a Leica EM ACE600 Coater (Leica Microsystems Inc., Buffalo Grove, IL).  
746 Stubs were examined with the FE-SEM FEI Teneo (FEI, Inc., Hillsboro, OR) using the  
747 secondary electron detector to obtain digital images.

748

749 **Calcium Measurements.** To measure Ca<sup>2+</sup> in PfERC mutants, knockdown was induced  
750 on synchronized schizonts. After 48hrs, schizonts were percoll purified and permeabilized  
751 selectively by treatment with ice-cold 0.04% saponin in PBS for 10 min. Isolated parasites  
752 were then washed 2X with BAG Buffer (116mM NaCl, 5.4mM KCl, 0.8mM MgSO<sub>4</sub>·7H<sub>2</sub>O,  
753 50mM HEPES, 5.5mM Glucose) + 7.5mM GlcN and incubated with 10 $\mu$ M Fluo-4AM  
754 (ThermoFisher) for 45min while rocking at 37°C. After incubation, cells were washed 2X  
755 with BAG buffer + 7.5mM GlcN and immediately taken for fluorimetric measurements.  
756 Fluorescence measurements were carried out in a cuvette (Sarstedt) containing parasites  
757 suspended in 2.5 ml of BAG buffer and 100 $\mu$ M EGTA (Sigma). The cuvette was placed  
758 in a Hitachi F-4500 fluorescence spectrophotometer and Fluo-4AM excitation was done  
759 at 505 nm with emission read at 530 nm (80). Drugs and reagents were added via a

760 Hamilton syringe. Final concentration of CPA (Sigma) was 3  $\mu$ M, and Ionomycin (Sigma)  
761 at 2 $\mu$ M.

762 Loading of *Toxoplasma gondii* tachyzoites with Fura-2AM (ThermoFisher) was  
763 done as previously described (40). Briefly, freshly collected parasites were washed twice  
764 with BAG by centrifugation (706 g for 10 min) and resuspended at a final density of 1 x  
765 10<sup>9</sup> parasites/ml in loading buffer (BAG plus 1.5% sucrose, and 5 $\mu$ M Fura-2AM). The  
766 suspension was incubated for 26 min at 26 °C with mild agitation. Subsequently, parasites  
767 were washed twice with BAG to remove extracellular dye, re-suspended to a final density  
768 of 1 x 10<sup>9</sup>/ml in BAG and kept on ice. For fluorescence measurements, 2 x 10<sup>7</sup>  
769 parasites/ml were placed in a cuvette with 2.5 ml of BAG buffer. Fluorescence  
770 measurements were done in a Hitachi F-7000 fluorescence spectrophotometer using the  
771 Fura-2AM conditions for excitation (340 and 380 nm) and emission (510 nm). The Fura-  
772 2AM fluorescence response to Ca<sup>2+</sup> was calibrated from the ratio of 340/380 nm  
773 fluorescence values after subtraction of the background fluorescence of the cells at 340  
774 and 380 nm as described previously (81). The Ca<sup>2+</sup> release rate is the change in Ca<sup>2+</sup>  
775 concentration during the initial 20 s after compound addition (41).

776

## 777 **Acknowledgments**

778 We thank Michael Reese for comments on the manuscript; Dan Goldberg for comments  
779 on the manuscript, anti Ef1 $\alpha$  and anti-PMV antibodies; The European Malaria Reagent  
780 Repository for anti-MSP1 12.4 and anti-RAP1 2.29, antibodies; Alan Thomas and BEI  
781 Resources NIAID, NIH for anti-AMA1 28G2 and anti-BiP antibodies; Zhicheng Dou and  
782 Michael Blackman for anti-SUB1 antibody; Purnima Bhanot for Compound 1 and  
783 Compound 2; Muthugapatti Kandasamy at the University of Georgia Biomedical  
784 Microscopy Core, Julie Nelson at the CTEGD Cytometry Shared Resource Lab, and  
785 Mary Ard from the Georgia Electron Microscopy for technical assistance; Michael  
786 Cipriano for assistance with protein alignment. This work was supported by UGA Startup  
787 funds and UGA Faculty Research Grant (FRG-SE0031) to V.M., and the US National  
788 Institutes of Health (R21AI133322) to V.M. and S.N.J.M., and (T32AI060546) to M.A.F.

789

790

## 791 **References**

- 792 1. Torgerson PR, Mastroiacovo P. The global burden of congenital toxoplasmosis: a  
793 systematic review. *Bull World Health Organ.* 2013;91(7):501-8.
- 794 2. Checkley W, White J, A. Clinton, Jaganath D, Arrowood MJ, Chalmers RM, Chen X,  
795 et al. A review of the global burden, novel diagnostics, therapeutics, and vaccine  
796 targets for cryptosporidium. *Lancet Infect Dis.* 2015; 15:85-94.
- 797 3. Liu L, Oza S, Hogan D, Chu Y, Perin J, Zhu J, et al. Global, regional, and national  
798 causes of under-5 mortality in 2000-15: an updated systematic analysis with  
799 implications for the Sustainable Development Goals. *Lancet.* 2016;388(10063):3027-  
800 35.
- 801 4. WHO. World Malaria Report 2017. Geneva: World Health Organization 2017
- 802 5. Dondorp AM, Nosten F, Yi P, Das D, Phyto AP, Tarning J, et al. Artemisinin  
803 resistance in *Plasmodium falciparum* malaria. *N Engl J Med.* 2009;361(5):455-67.
- 804 6. Mita T, Venkatesan M, Ohashi J, Culleton R, Takahashi N, Tsukahara T, et al.  
805 Limited geographical origin and global spread of sulfadoxine-resistant "dhps" alleles  
806 in *Plasmodium falciparum* populations. *J Infect Dis.* 2011(12):1980.
- 807 7. Roper C, Pearce R, Nair S, Sharp B, François Nosten, Anderson T. Intercontinental  
808 spread of pyrimethamine-resistant malaria. *Science.* 2004(5687):1124.
- 809 8. Gosling R, Lorenz vS. The future of the RTS,S/AS01 malaria vaccine: an alternative  
810 development plan. *PLoS Medicine*, 2016;13 :e1001994.
- 811 9. Donald RGK, Allocco J, Singh SB, Nare B, Salowe SP, Wiltsie J, et al. *Toxoplasma*  
812 *gondii* cyclic GMP-dependent kinase: chemotherapeutic targeting of an essential  
813 parasite protein kinase. *Eukaryot Cell.* 2002;1(3):317-28.
- 814 10. Christine RC, Hackett F, Strath M, Penzo M, Chrislaine Withers-Martinez, David AB,  
815 et al. Malaria parasite cGMP-dependent protein kinase regulates blood stage  
816 merozoite secretory organelle discharge and egress. *PLoS Pathogens*, 2013;  
817 9(5):e1003344.
- 818 11. Brochet M, Collins MO, Smith TK, Thompson E, Sebastian S, Volkmann K, Schwach  
819 F, et al. Phosphoinositide metabolism links cGMP-dependent protein kinase G to  
820 essential Ca<sup>2+</sup> signals at key decision points in the life cycle of malaria parasites.  
821 *PloS Biology*, 2014; 12(3): e1001806

- 822 12. Hortua Triana MA, Márquez-Nogueras KM, Vella SA, Moreno SNJ. Calcium  
823 signaling and the lytic cycle of the Apicomplexan parasite *Toxoplasma gondii*. *BBA -*  
824 *Molecular Cell Research*. 2018; 1865: 1846-1856
- 825 13. Brochet M, Billker O. Calcium signalling in malaria parasites. *Mol Microbiol*. 2016;  
826 100(3):397-408.
- 827 14. Holder A, Baker D, Baker DA, Taylor HM, Sicard A, Grainger M, et al. The malaria  
828 parasite cyclic GMP-dependent protein kinase plays a central role in blood-stage  
829 schizogony. *Eukaryot Cell*. 2010;9(1):37-45.
- 830 15. Hale VL, Watermeyer JM, Hackett F, Vizcay G, Ooij Cv, Thomas JA, et al.  
831 Parasitophorous vacuole poration precedes its rupture and rapid host erythrocyte  
832 cytoskeleton collapse in *Plasmodium falciparum* egress. *Proc Natl Acad Sci USA*.  
833 2017; 114(13):3439-3444.
- 834 16. Absalon S, Blomqvist K, Rudlaff RM, DeLano TJ, Pollastri MP, Dvorin JD. Calcium-  
835 dependent protein kinase 5 is required for release of egress-specific organelles in  
836 *Plasmodium falciparum*. *MBio*. 2018;9(1):e00130.
- 837 17. Glushakova S, Beck JR, Garten M, Busse BL, Nasamu AS, Tenkova-Heuser T, et  
838 al. Rounding precedes rupture and breakdown of vacuolar membranes minutes  
839 before malaria parasite egress from erythrocytes. *Cell Microbiol*. 2018;  
840 20(10):e12868.
- 841 18. Garg S, Agarwal S, Chitnis CE, Singh S, Kumar S, Yazdani SS. Calcium-dependent  
842 permeabilization of erythrocytes by a perforin-like protein during egress of malaria  
843 parasites. *Nat Commun*. 2013;4: 1736
- 844 19. Lourido S, Moreno SNJ. The calcium signaling toolkit of the Apicomplexan parasites  
845 *Toxoplasma gondii* and *Plasmodium* spp. *Cell Calcium*. 2015;57(3):186-93.
- 846 20. Lourido S, Tang K, Sibley LD. Distinct signalling pathways control *Toxoplasma*  
847 egress and host-cell invasion. *EMBO J*. 2012;31(24):4524-34.
- 848 21. Yeoh S, O'Donnell RA, Koussis K, Dluzewski AR, Ansell KH, Osborne SA, et al.  
849 Subcellular discharge of a serine protease mediates release of invasive malaria  
850 parasites from host erythrocytes. *Cell*. 2007;131(6):1072-83.



- 851 22. Nasamu AS, Glushakova S, Russo I, Oksman BVA, Kim AS, Fremont DH, et al.  
852 Plasmepsins IX and X are essential and druggable mediators of malaria parasite  
853 egress and invasion. *Science*. 2017; 358(6362):518-522.
- 854 23. Pino P, Caldelari R, Mukherjee B, Vahokoski J, Klages N, Maco B, et al. A  
855 multistage antimalarial targets the plasmepsins IX and X essential for invasion and  
856 egress. *Science*. 2017; 358(6362):522-528.
- 857 24. Blackman MJ, Fujioka H, Stafford WHL, Sajid M, Clough B, Fleck SL, et al. A  
858 subtilisin-like protein in secretory organelles of *Plasmodium falciparum* merozoites. *J*  
859 *Biol Chem*. 1998; 273(36):23398-409.
- 860 25. Sajid M, Withers-Martinez C, Blackman MJ. Maturation and specificity of  
861 *Plasmodium falciparum* subtilisin-like protease-1, a malaria merozoite subtilisin-like  
862 serine protease. *J Biol Chem*. 2000; 275(1):631-41.
- 863 26. Tawk L, Kent R, Gorgette O, Mercereau-Puijalon O, Barale J, Lacroix C, et al. A key  
864 role for plasmodium subtilisin-like SUB1 protease in egress of malaria parasites from  
865 host hepatocytes. *J Biol Chem*. 2013;288(46):33336-46.
- 866 27. Das S, Hertrich N, Perrin AJ, Withers-Martinez C, Collins CR, Jones ML, et al.  
867 Processing of *Plasmodium falciparum* merozoite surface protein MSP1 activates a  
868 spectrin-binding function enabling parasite egress from RBCs. *Cell Host Microbe*.  
869 2015;18(4):433-44.
- 870 28. Thomas JA, Tan MSY, Hackett F, Blackman MJ, Bisson C, Umrekar TR, et al. A  
871 protease cascade regulates release of the human malaria parasite *Plasmodium*  
872 *falciparum* from host red blood cells. *Nat Microbiol*. 2018;3(4):447-55.
- 873 29. Besteiro S, Lebrun M, Lamarque M, Besteiro S, Papoin J, Roques M, et al. The  
874 RON2-AMA1 interaction is a critical step in moving junction-dependent invasion by  
875 Apicomplexan Parasites. *PLoS Pathogens*. 2011;7(2): e1001276.
- 876 30. Paul AS, Egan ES, Duraisingh MT. Host-parasite interactions that guide red blood  
877 cell invasion by malaria parasites. *Curr Opin Hematol*. 2015;22(3):220-226.
- 878 31. Tomavo S, Slomianny C, Meissner M, Vern BC. Protein trafficking through the  
879 endosomal system prepares intracellular parasites for a home invasion. *PLoS*  
880 *Pathogens*. 2013; 9(10):e1003629.



- 881 32. Coffey MJ, Jennison C, Tonkin CJ, Boddey JA. Role of the ER and Golgi in protein  
882 export by Apicomplexa. *Curr Opin Cell Biol.* 2016;41:18-24.
- 883 33. Greca N, Hibbs AR, Riffkin C, Foley M, Tilley L. Identification of an endoplasmic  
884 reticulum-resident calcium-binding protein with multiple EF-hand motifs in asexual  
885 stages of *Plasmodium falciparum*. *Mol Biochem Parasitol.* 1997;89(2):283-93.
- 886 34. Honoré B. The rapidly expanding CREC protein family: members, localization,  
887 function, and role in disease. *Bioessays.* 2009;31(3):262-77.
- 888 35. Prommana P, Uthaipibull C, Wongsombat C, Kamchonwongpaisan S, Yuthavong Y,  
889 Knuepfer E, et al. Inducible knockdown of *Plasmodium* gene expression using the  
890 glmS ribozyme. *PLoS ONE.* 2013;8(8): e73783.
- 891 36. Salmon BL, Oksman A, Goldberg DE. Malaria parasite exit from the host  
892 erythrocyte: a two-step process requiring extraerythrocytic proteolysis. *Proc Natl*  
893 *Acad Sci U S A.* 2001; 98(1):271-6.
- 894 37. Sidik SM, Hackett CG, Tran F, Westwood NJ, Lourido S. Efficient genome  
895 engineering of *Toxoplasma gondii* using CRISPR/Cas9. *PLoS ONE.* 2014;9(6):  
896 e100450.
- 897 38. Shen B, Brown KM, Lee TD, Sibley LD. Efficient gene disruption in diverse strains of  
898 *Toxoplasma gondii* using CRISPR/CAS9. *MBio.* 2014;5(3): e01114-14.
- 899 39. Moreno SNJ, Zhong L. Acidocalcisomes in *Toxoplasma gondii* tachyzoites. *Biochem*  
900 *J.* 1996; 313(Pt2):655-9.
- 901 40. Pace DA, McKnight CA, Liu J, Jimenez V, Moreno SNJ. Calcium entry in  
902 *Toxoplasma gondii* and its enhancing effect of invasion-linked traits. *J Biol Chem.*  
903 2014;289(28):19637-47.
- 904 41. Alleva LM. Calcium regulation in the intraerythrocytic malaria parasite *Plasmodium*  
905 *falciparum*. *Molecular and biochemical parasitology.* 2001;117(2):121-8.
- 906 42. Giganti D, Bouillon A, Tawk L, Robert F, Martinez M, Crublet E, et al. A novel  
907 *Plasmodium*-specific prodomain fold regulates the malaria drug target SUB1  
908 subtilase. *Nat Commun.* 2014;5:4833.
- 909 43. Goel VK, Li X, Chen H, Shih-Chun Liu, Chishti AH, Steven SO. Band 3 Is a host  
910 receptor binding merozoite surface protein 1 during the *Plasmodium falciparum*  
911 invasion of erythrocytes. *Proc Natl Acad Sciences USA.* 2003; 100(9):5164-9.

- 912 44. Li X, Chen H, Oo TH, Daly TM, Bergman LW, Shih-Chun Liu, et al. A co-ligand  
913 complex anchors *Plasmodium falciparum* merozoites to the erythrocyte invasion  
914 receptor b and 3. *J Biol Chem.* 2004;279(7):5765-71.
- 915 45. Baldwin MR, Li X, Hanada T, Liu S, Chishti AH. Merozoite surface protein 1  
916 recognition of host glycophorin A mediates malaria parasite invasion of red blood  
917 cells. *Blood.* 2015; 125(17):2704-11.
- 918 46. Boyle MJ, Wilson DW, Richards JS, Riglar DT, Tetteh K, Conway DJ, et al. Isolation  
919 of viable *Plasmodium falciparum* merozoites to define erythrocyte invasion events  
920 and advance vaccine and drug development. *Proc Natl Acad Sciences USA.* 2010;  
921 107(32): 14378-83.
- 922 47. Lin CS, Uboldi AD, Epp C, Bujard H, Tsuboi T, Czabotar PE, et al. Multiple  
923 *Plasmodium falciparum* merozoite surface protein 1 complexes mediate merozoite  
924 binding to human erythrocytes. *J Biol Chem.* 2016;291(14):7703-15.
- 925 48. Bannister LH, Mitchell GH, Butcher GA, Dennis ED. Lamellar membranes  
926 associated with rhoptries in erythrocytic merozoites of *Plasmodium knowlesi*: a clue  
927 to the mechanism of invasion. *Parasitology.* 1986;92(pt2):291-303.
- 928 49. Riglar DT, Richard D, Wilson DW, Boyle MJ, Dekiwadia C, Turnbull L, et al. Super-  
929 resolution dissection of coordinated events during malaria parasite invasion of the  
930 human erythrocyte. *Cell Host Microbe.* 2011;9(1):9-20.
- 931 50. Cowman AF, Tonkin CJ, Tham W, Duraisingh MT. The molecular basis of  
932 erythrocyte invasion by malaria parasites. *Cell Host Microbe.* 2017;22:232-45.
- 933 51. Howard RF, Schmidt CM. The secretory pathway of *Plasmodium falciparum*  
934 regulates transport of p82/RAP-1 to the rhoptries. *Mol Biochem Parasitol.*  
935 1995;74(1):43-54.
- 936 52. Howard RF, Narum D, Blackman M, Thurman J. Analysis of the processing of  
937 *Plasmodium falciparum* rhoptry-associated protein 1 and localization of Pr86 to  
938 schizont rhoptries and p67 to free merozoites. *Mol Biochem Parasitol.* 1998;  
939 92(1):111-22.
- 940 53. Narum DL, Thomas AW. Differential localization of full-length and processed forms  
941 of PF83/AMA-1 an apical membrane antigen of *Plasmodium falciparum* merozoites.  
942 *Mol Biochem Parasitol.* 1994;67(1):59-68.

- 943 54. Howell SA, Withers-Martinez C, Kocken C, Thomas AW, Blackman MJ. Proteolytic  
944 processing and primary structure of Plasmodium falciparum apical membrane  
945 antigen-1. *J Biol Chem.* 2001;276(33):31311-20.
- 946 55. Bannister LH, Hopkins JM, Dluzewski AR, Margos G, Williams IT, Blackman MJ, et  
947 al. Plasmodium falciparum apical membrane antigen 1 (PfAMA-1) is translocated  
948 within micronemes along subpellicular microtubules during merozoite development.  
949 *J Cell Sci.* 2003;116(18):3825-34.
- 950 56. Healer J, Tiriglia T, Hodder AN, Gemmill AW, Cowman AF. Functional analysis of  
951 Plasmodium falciparum apical membrane antigen 1 utilizing interspecies domains.  
952 *Infect Immun.* 2005; 73(4):2444-2451.
- 953 57. Santos JM, Josling G, Ross P, Joshi P, Orchard L, Campbell T, et al. Red blood cell  
954 invasion by the malaria parasite is coordinated by the PfAP2-I transcription factor.  
955 *Cell Host Microbe.* 2017;21(6): 731-741.e10.
- 956 58. Kim H, Morita M, Sanai H, Hiramoto A, Sato A, Wataya Y, et al. Plasmodium  
957 falciparum endoplasmic reticulum-resident calcium binding protein is a possible  
958 target of synthetic antimalarial endoperoxides, N-89 and N-251. *J Proteome Res.*  
959 2012;11(12):5704-11.
- 960 59. Billker O, Lourido S, Sibley LD. Calcium-Dependent Signaling and Kinases in  
961 Apicomplexan Parasites. *Cell Host & Microbe.* 2009;5(6):612-22.
- 962 60. Lagal V, Binder EM, Huynh M, Kafsack BFC, Harris PK, Diez R, et al. Toxoplasma  
963 gondii protease TgSUB1 is required for cell surface processing of micronemal  
964 adhesive complexes and efficient adhesion of tachyzoites. *Cell Microbiol.*  
965 2010;12(12):1792-808.
- 966 61. Monerri NCS, Flynn HR, Campos MG, Hackett F, Koussis K, Withers-Martinez C, et  
967 al. Global identification of multiple substrates for Plasmodium falciparum SUB1, an  
968 essential malarial processing protease. *Infect Immun.* 2011;79(3):1086-1097.
- 969 62. Knuepfer E, Rug M, Klonis N, Tilley L, Cowman AF. Trafficking of the major  
970 virulence factor to the surface of transfected P falciparum-infected erythrocytes.  
971 *Blood.* 2005;105(10):4078-87.

- 972 63. Jung DH, Mo SH, Kim DH. Calumenin, a multiple EF-hands Ca<sup>2+</sup>-binding protein,  
973 interacts with ryanodine receptor-1 in rabbit skeletal sarcoplasmic reticulum.  
974 *Biochem Biophys Res Commun.* 2006;343(1):34-42.
- 975 64. Xu S, Xu Y, Chen L, Fang Q, Song S, Chen J, et al. RCN1 suppresses ER stress-  
976 induced apoptosis via calcium homeostasis and PERK-CHOP signaling.  
977 *Oncogenesis.* 2017 Mar 20,;6(3):e304.
- 978 65. Mazzorana M, Hussain R, Sorensen T. Ca-dependent folding of human calumenin.  
979 *PLoS ONE.* 2016;11(3): e0151547.
- 980 66. Yonezawa N, Suzuki N, Ban S, Itoh E, Chen S, Yonezawa N, et al. Calcium-  
981 dependent structural changes in human reticulocalbin-1. *J Biochem.*  
982 2014;155(5):281-93.
- 983 67. Mok S, Ashley EA, Ferreira PE, Zhu L, Lin Z, Yeo T, et al. Population  
984 transcriptomics of human malaria parasites reveals the mechanism of artemisinin  
985 resistance. *Science.* 2015;347(6220):431-435.
- 986 68. Drew ME, Banerjee R, Uffman EW, Gilbertson S, Rosenthal PJ, Goldberg DE.  
987 *Plasmodium* food vacuole plasmepsins are activated by falcipains. *J Biol Chem.*  
988 2008(19):12870-12876.
- 989 69. Russo I, Oksman A, Goldberg DE. Fatty acid acylation regulates trafficking of the  
990 unusual *Plasmodium falciparum* calpain to the nucleolus. *Mol Microbiol.* 2009;  
991 72(1):229-245.
- 992 70. Cobb DW, Florentin A, Fierro MA, Krakowiak M, Moore JM, Muralidharan V. The  
993 exported chaperone PfHsp70x is dispensable for the *Plasmodium falciparum*  
994 intraerythrocytic life cycle. *mSphere.* 2017 Oct 25,;2(5):e00363-17.
- 995 71. Florentin A, Cobb DW, Fishburn JD, Cipriano MJ, Kim PS, Fierro MA, et al. PfClpC  
996 is an essential Clp chaperone required for plastid integrity and Clp protease stability  
997 in *Plasmodium falciparum*. *Cell Reports.* 2017; 21(7):1746-56.
- 998 72. Farwell DG, Shera KA, Koop JI, Bonnet GA, Matthews CP, Reuther GW, et al.  
999 Genetic and epigenetic changes in human epithelial cells immortalized by  
1000 telomerase. *Am J Pathol.* 2000; 156(5):1537-47.

- 1001 73. Spillman NJ, Beck JR, Ganesan SM, Niles JC, Goldberg DE. The chaperonin TRiC  
1002 forms an oligomeric complex in the malaria parasite cytosol. *Cell Microbiol.* 2017;  
1003 19(6): e12719.
- 1004 74. Ganesan SM, Morrisey JM, Ke H, Painter HJ, Laroia K, Phillips MA, et al. Yeast  
1005 dihydroorotate dehydrogenase as a new selectable marker for *Plasmodium*  
1006 *falciparum* transfection. *MolBiochem Parasitol.* 2011;177(1):29-34.
- 1007 75. Ghorbal M, Gorman M, Macpherson CR, Martins RM, Scherf A, Lopez-Rubio J.  
1008 Genome editing in the human malaria parasite *Plasmodium falciparum* using the  
1009 CRISPR-Cas9 system. *Nat Biotechnol.* 2014;32(8):819-21.
- 1010 76. Liu J, Pace D, Dou Z, King TP, Guidot D, Li ZH, et al. A vacuolar-H<sup>+</sup>-  
1011 pyrophosphatase (TgVP1) is required for microneme secretion, host cell invasion,  
1012 and extracellular survival of *Toxoplasma gondii*. *Mol Microbiol.* 2014;93(4):698-712.
- 1013 77. Laemmli UK. Cleavage of structural proteins during the assembly of the head of  
1014 bacteriophage T4. *Nature.* 1970;227(5259):680-5.
- 1015 78. Hager KM, Striepen B, Tilney LG, Roos DS. The nuclear envelope serves as an  
1016 intermediary between the ER and Golgi complex in the intracellular parasite  
1017 *Toxoplasma gondii*. *J Cell Sci.* 1999;112(16):2631.
- 1018 79. Budu A, Gomes MM, Melo PM, El CM, Bagnaresi P, Azevedo MF, et al.  
1019 Calmidazolium evokes high calcium fluctuations in *Plasmodium falciparum*. *Cell*  
1020 *Signal.* 2016;28(3):125-35.
- 1021 80. Grynkiewicz G, Poenie M, Tsien RY. A new generation of Ca<sup>2+</sup> indicators with  
1022 greatly improved fluorescence properties. *J Biol Chem.* 1985;260(6):3440-50.
- 1023 81. Waterhouse AM, Procter JB, Martin DM, Clamp M, Barton GJ. Jalview Version 2-a  
1024 multiple sequence alignment editor and analysis workbench. *Bioinformatics.* 2009;  
1025 25(9):1189-91.

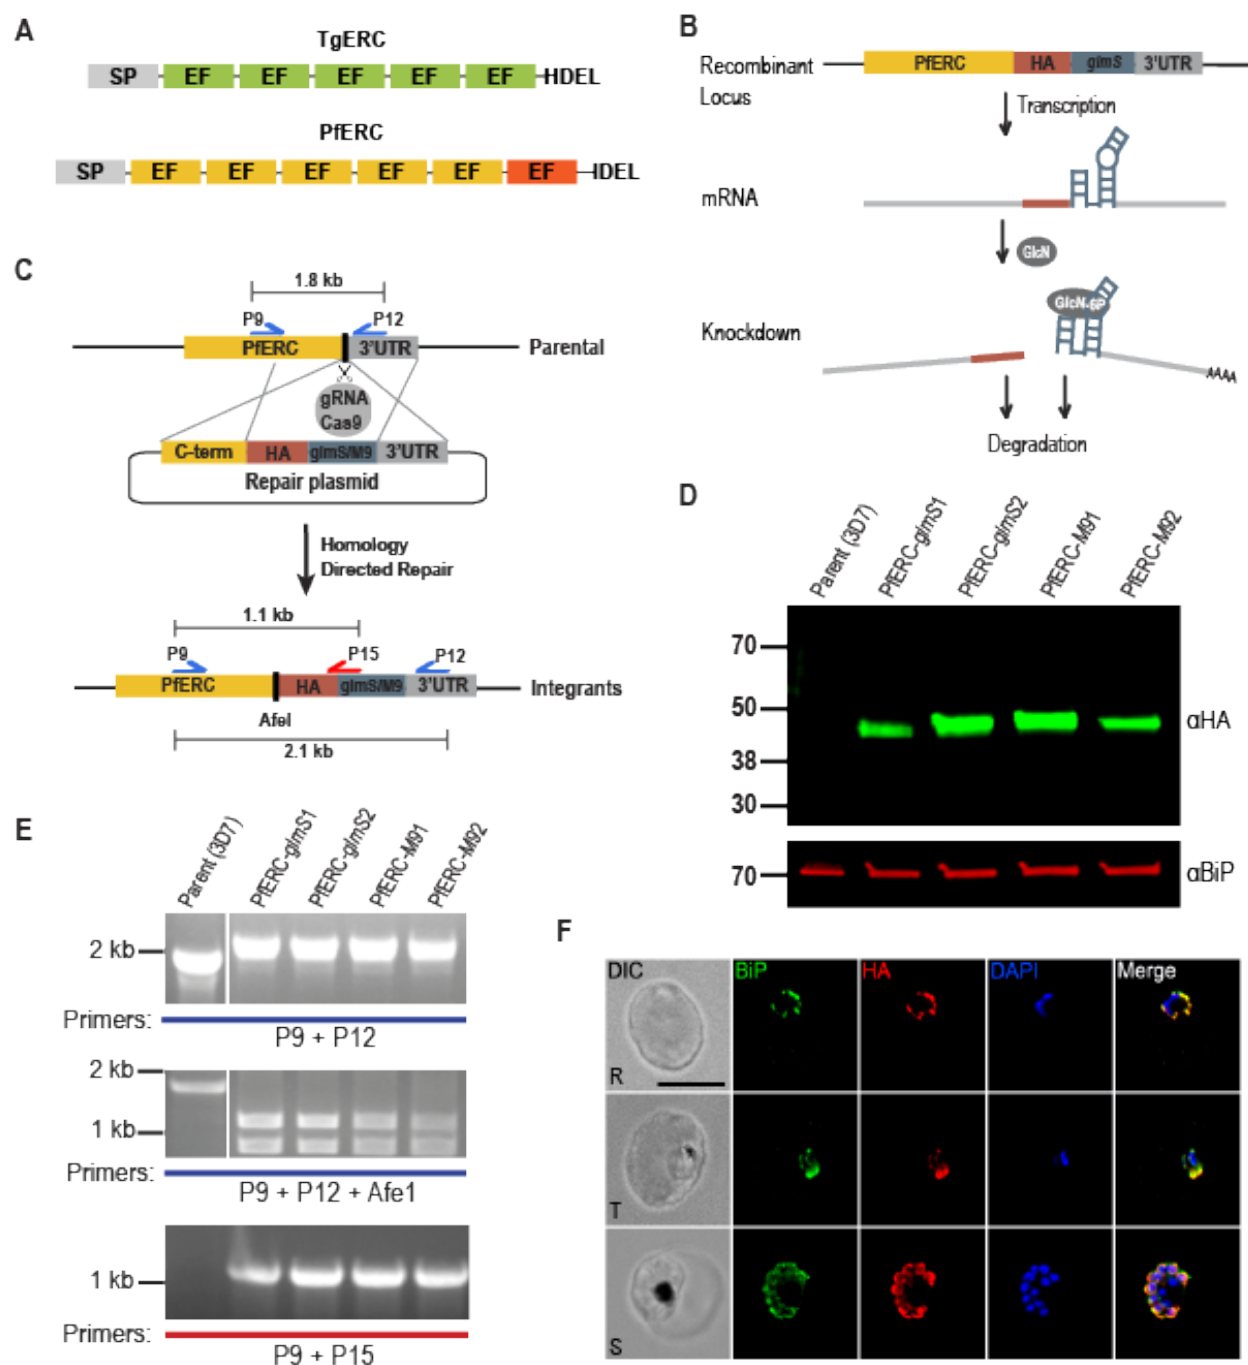

1026 **Figure 1: Generating PfERC-*glmS/M9* mutant parasites.** (A) Schematic  
 1027 representation of the domain structure of PfERC and TgERC. Both proteins contain a  
 1028 signal peptide, 5 (TgERC) or 6 (PfERC) EF hands, and an ER-retention signal. (B)  
 1029 Mechanism of the conditional expression of PfERC using the *glmS* ribozyme system.  
 1030 This is an inactive ribozyme that is transcribed, but not translated, with the mRNA of a  
 1031 protein of interest. Addition of glucosamine (GlcN) leads to its phosphorylation within the

1032 cell to glucosamine-6-phosphate (GlcN-6P). GlcN-6P binds to the transcribed PfERC-  
1033 *glmS* mRNA and the *glmS* ribozyme is activated and cleaves itself from the mRNA. This  
1034 leads to disassociation of the mRNA from its poly-A tail and leads to the degradation of  
1035 target specific mRNA. The resulting decline in mRNA levels leads to reduced protein  
1036 levels and, thus, loss of gene expression. As a control, we generated parasite lines  
1037 containing a mutated version of the *glmS* ribozyme, called *M9*, which cannot cleave  
1038 itself upon binding of GlcN. (C) Using the CRISPR/Cas9 system, we induced a double-  
1039 stranded break in the PfERC locus that was repaired by a donor plasmid containing  
1040 homology templates to the PfERC locus and appended a C-terminal 3XHA tag and a  
1041 stop codon followed by the *glmS* or *M9* sequence to the targeted gene. The location of  
1042 diagnostic primers used to demonstrate the repair of the locus via double cross-over  
1043 homologous integration are also shown (P5, P8 and P11). (D) Western blot of lysates  
1044 isolated from two independent clones and the parental line (3D7) probed with anti-HA  
1045 antibodies show that the PfERC gene was tagged with HA in the mutants but not the  
1046 parental line. PfBiP was the loading control. (E) PCR analysis of the generated mutants  
1047 using specific primers (P5+P8; Table S1) in the C-terminus and 3'UTR of PfERC shows  
1048 integration of the HA tag and *glmS/M9* ribozymes into the PfERC locus. Modification of  
1049 PfERC gene introduces an *AfeI* restriction enzyme site in this locus that is absent in the  
1050 parental line. Digesting the PCR products (using *AfeI*) resulting from amplification using  
1051 primers P5+P8 shows that *AfeI* is able to digest the PCR products from our mutants but  
1052 not the parental line. PCR analysis using another primer pair (P5+P11) that sits on the  
1053 *glmS/M9* sequence shows that amplification only occurs in the mutants but not in the  
1054 parental line. (F) Representative IFA of PfERC-*M9* parasites showing that tagged  
1055 PfERC localizes to the ER as shown with co-localization with the ER chaperone BiP in  
1056 all asexual stages of the parasite. From left to right, the images are phase-contrast  
1057 micrographs of parasites, parasites stained with anti-BiP antibody (green), parasites  
1058 stained with anti-HA antibody (red), parasite nucleus stained with DAPI (blue), and  
1059 fluorescence merge images of the parasites. Abbreviations: R, rings; T, trophozoites; S,  
1060 schizonts. Scale bar, 5µm.



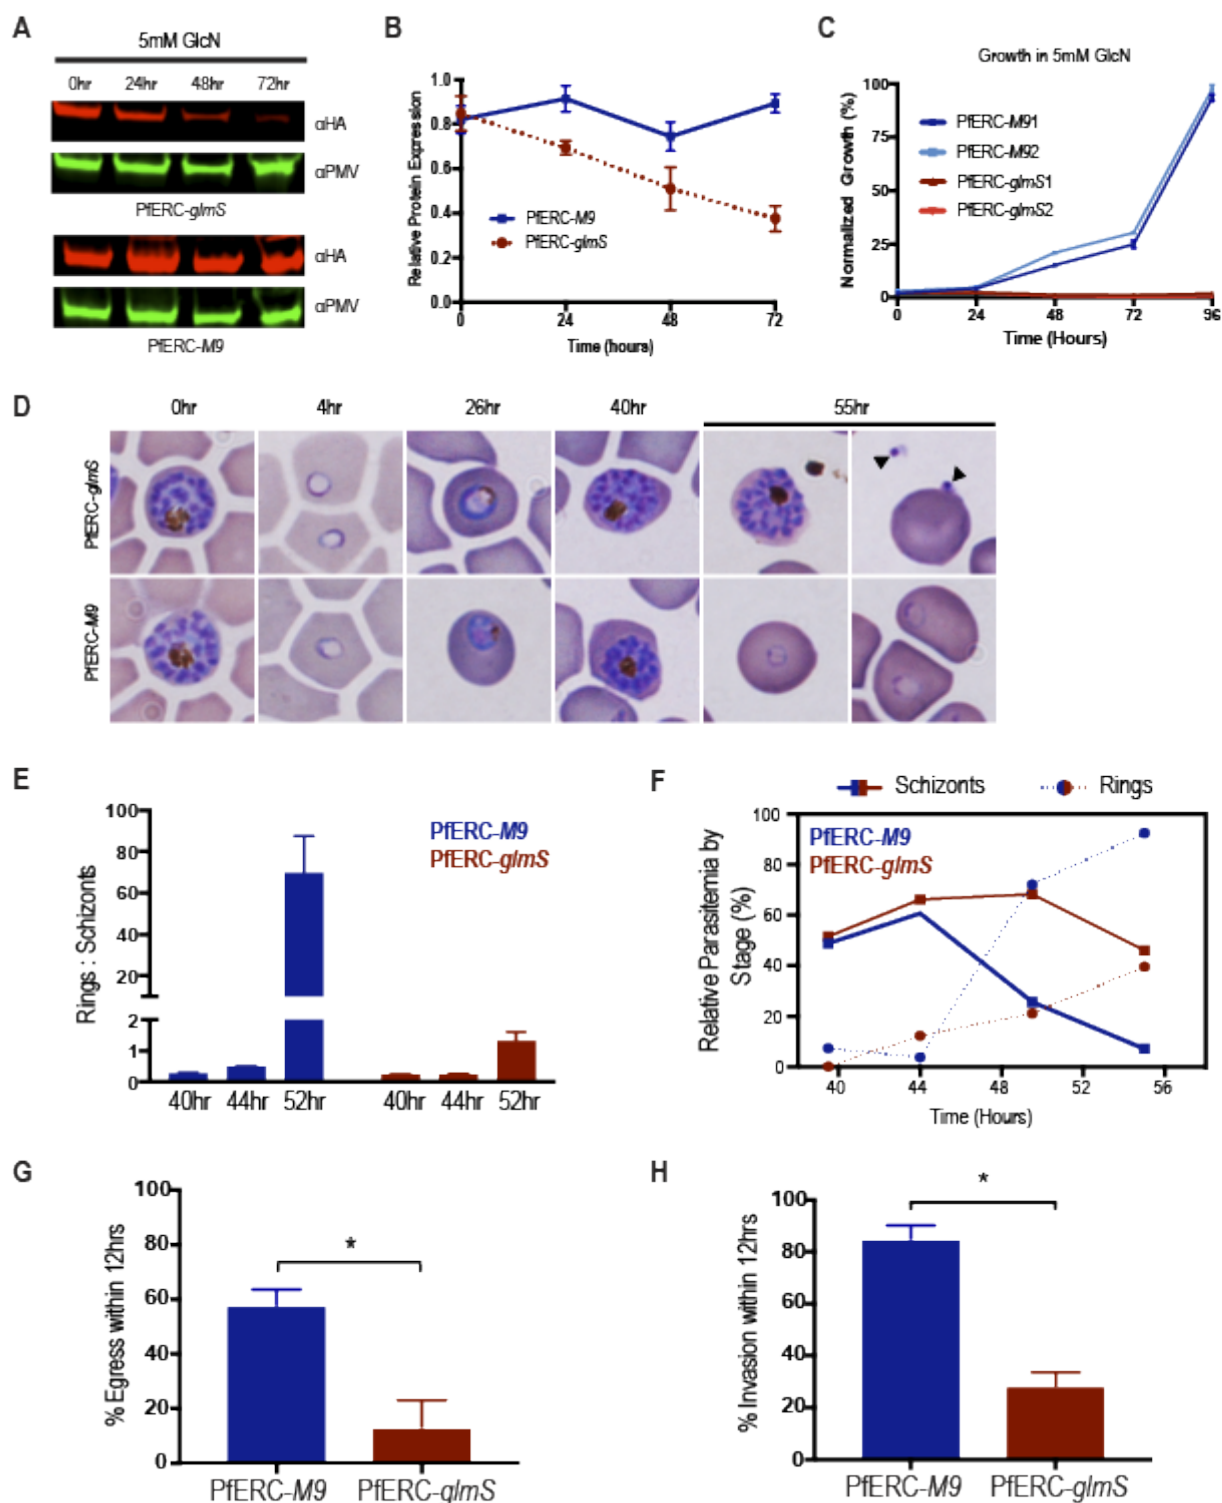

1061 **Figure 2: PfERC mutants fail to transition from schizonts to rings.** (A) Western blot  
 1062 of parasite lysates isolated from PfERC-*glmS* and PfERC-*M9* parasites grown in the  
 1063 presence of 7.5 mM GlcN and probed with antibodies against HA (red) and against the  
 1064 ER-resident protease Plasmepsin V (PMV; green). One representative experiment out of

1065 four is shown. (B) Quantification of the overall reduction in PfERC in PfERC-*glmS* and  
1066 PfERC-*M9* parasites over time after addition of GlcN, as shown in (A). Data were  
1067 normalized to the loading control (PMV) and are represented as mean  $\pm$  SEM (n=4  
1068 biological replicates). (C) Growth curve of asynchronous PfERC-*glmS* and PfERC-*M9*  
1069 clones grown in the presence of GlcN shows that PfERC is essential for asexual  
1070 reproduction. Data are normalized to parasites grown without GlcN and are represented  
1071 as the mean  $\pm$  SEM (n=3 biological replicates). (D) Representative blood smears of  
1072 synchronous PfERC-*glmS* and PfERC-*M9* parasites grown in the presence of GlcN (n=2  
1073 biological replicates). (E) Ring:schizont ratio of synchronous PfERC-*glmS* and PfERC-*M9*  
1074 parasites taken at 40-52hrs post-addition of GlcN. Data are represented as the mean  $\pm$   
1075 SEM (n=3 biological replicates). (F) The parasites shown in blood smears (D) were  
1076 counted. The amount of each lifecycle stage (ring, trophozoite, schizont) was determined  
1077 as a percentage of the total number of parasites for each time point. (G) The egress of  
1078 PfERC-*glmS* or PfERC-*M9* parasites was quantified by determining the amount of  
1079 schizonts in blood smears as in (D) present at 44hrs and at 56hrs. Egress was quantified  
1080 using the following equation: ( $\#$  of schizonts at 56h /  $\#$  schizonts at 44h) x100. Data are  
1081 represented as mean  $\pm$  SEM (n=2 biological replicates; \* $P$ <0.05, unpaired  $t$ -test). (H)  
1082 Invasion of PfERC-*glmS* or PfERC-*M9* parasites was quantified by determining the  
1083 amount of ring stages in blood smears as in (D) present at 44hrs and at 56hrs. This was  
1084 quantified using the following equation: ( $\#$  of rings at 44h /  $\#$  rings at 56h) x100. Data are  
1085 represented as mean  $\pm$  SEM (n=2 biological replicates; \* $P$ <0.05, unpaired  $t$ -test).

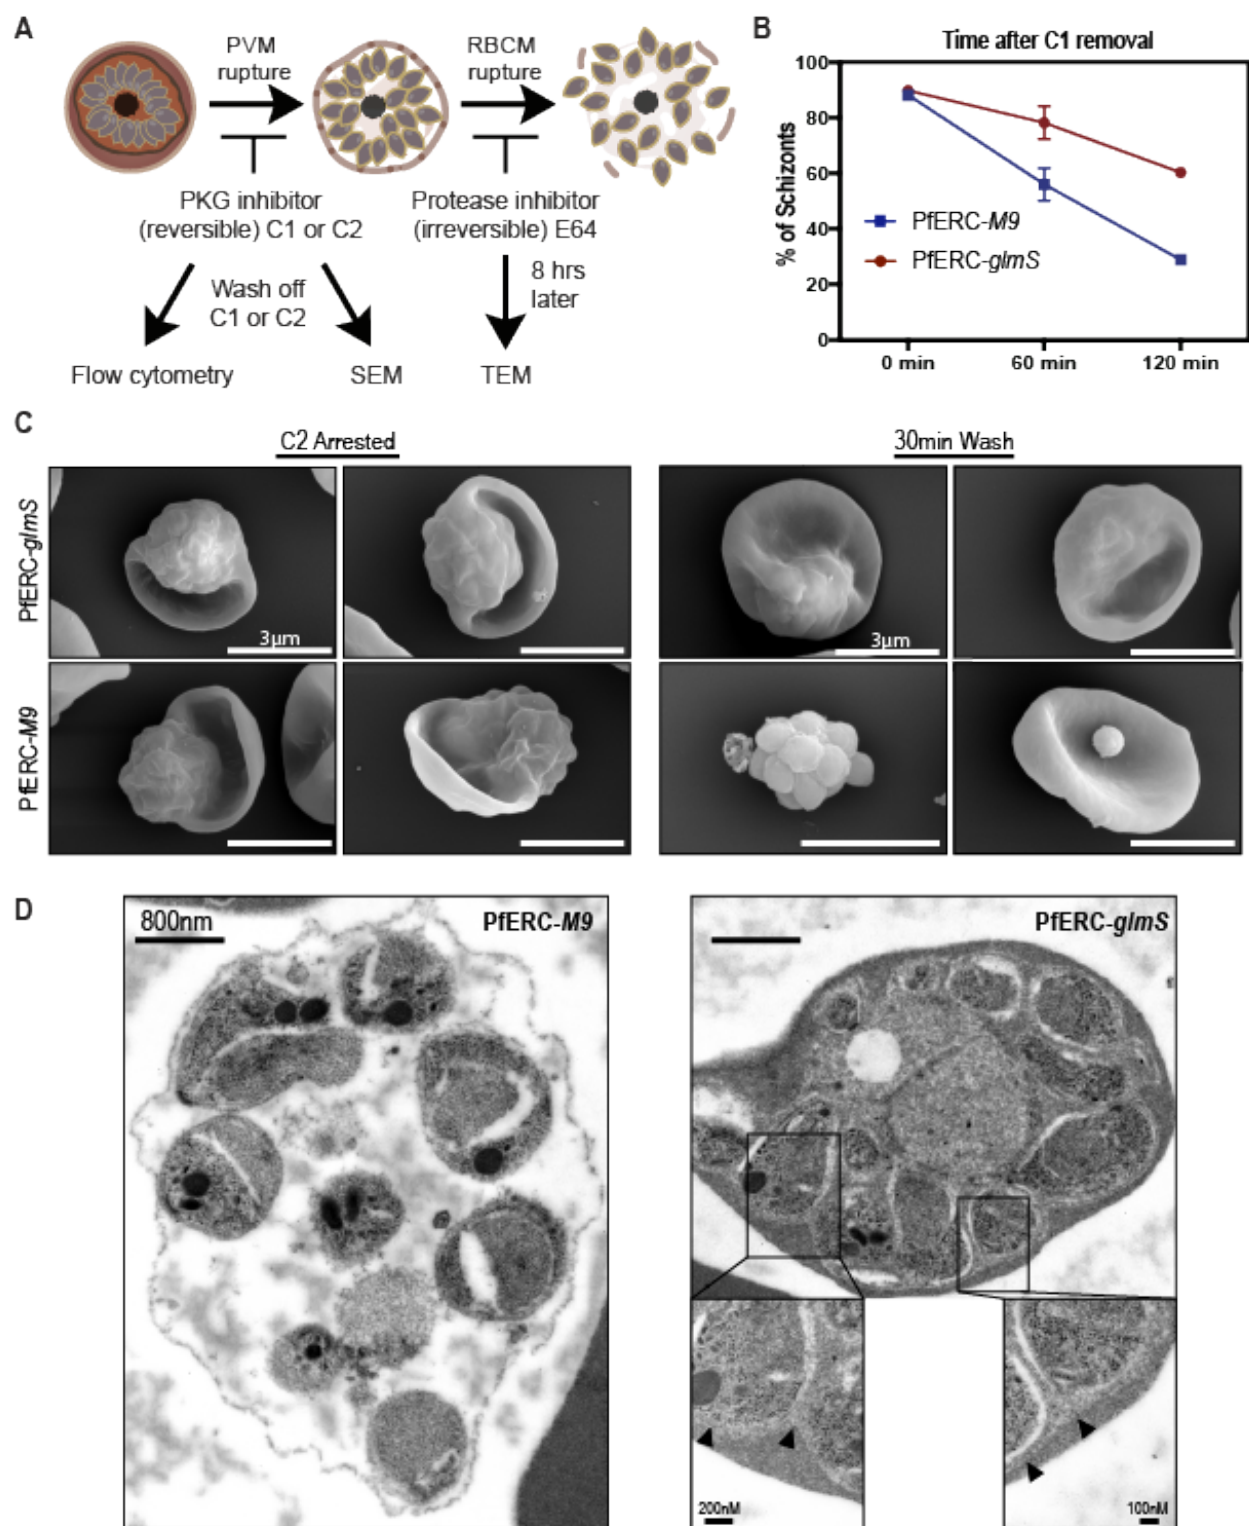

1086 **Figure 3: PfERC knockdown prevents PVM breakdown.** (A) Schematic showing the  
 1087 experimental layout to study the effect of PfERC knockdown using compounds that inhibit  
 1088 egress in parasites. Abbreviations: C1/2- PKG inhibitors, compound 1 or compound 2;

1089 SEM- Scanning Electron Microscopy; TEM- Transmission Electron Microscopy. (B) As  
1090 shown in (A), synchronized PFERC-*glmS* and PFERC-*M9* schizonts were observed by flow  
1091 cytometry after removal of C1 (time 0hr). Schizonts were quantified as a percentage of  
1092 the total amount of parasites as determined by flow cytometry. Data are represented as  
1093 the mean  $\pm$  SEM (n=3 biological replicates). (C) Representative SEM images of C2  
1094 arrested PFERC-*glmS* (n=2 biological replicates) and PFERC-*M9* (n=2 biological  
1095 replicates) mutants fixed immediately after washing off C2 and after 30mins, as shown in  
1096 (A). Scale bar, 800nm. (D) Representative TEM images of PFERC-*glmS* (n=2 biological  
1097 replicates) and PFERC-*M9* (n=2 biological replicates) schizonts incubated with E-64, as  
1098 shown in (A). PVM is marked by black arrowheads.

1099

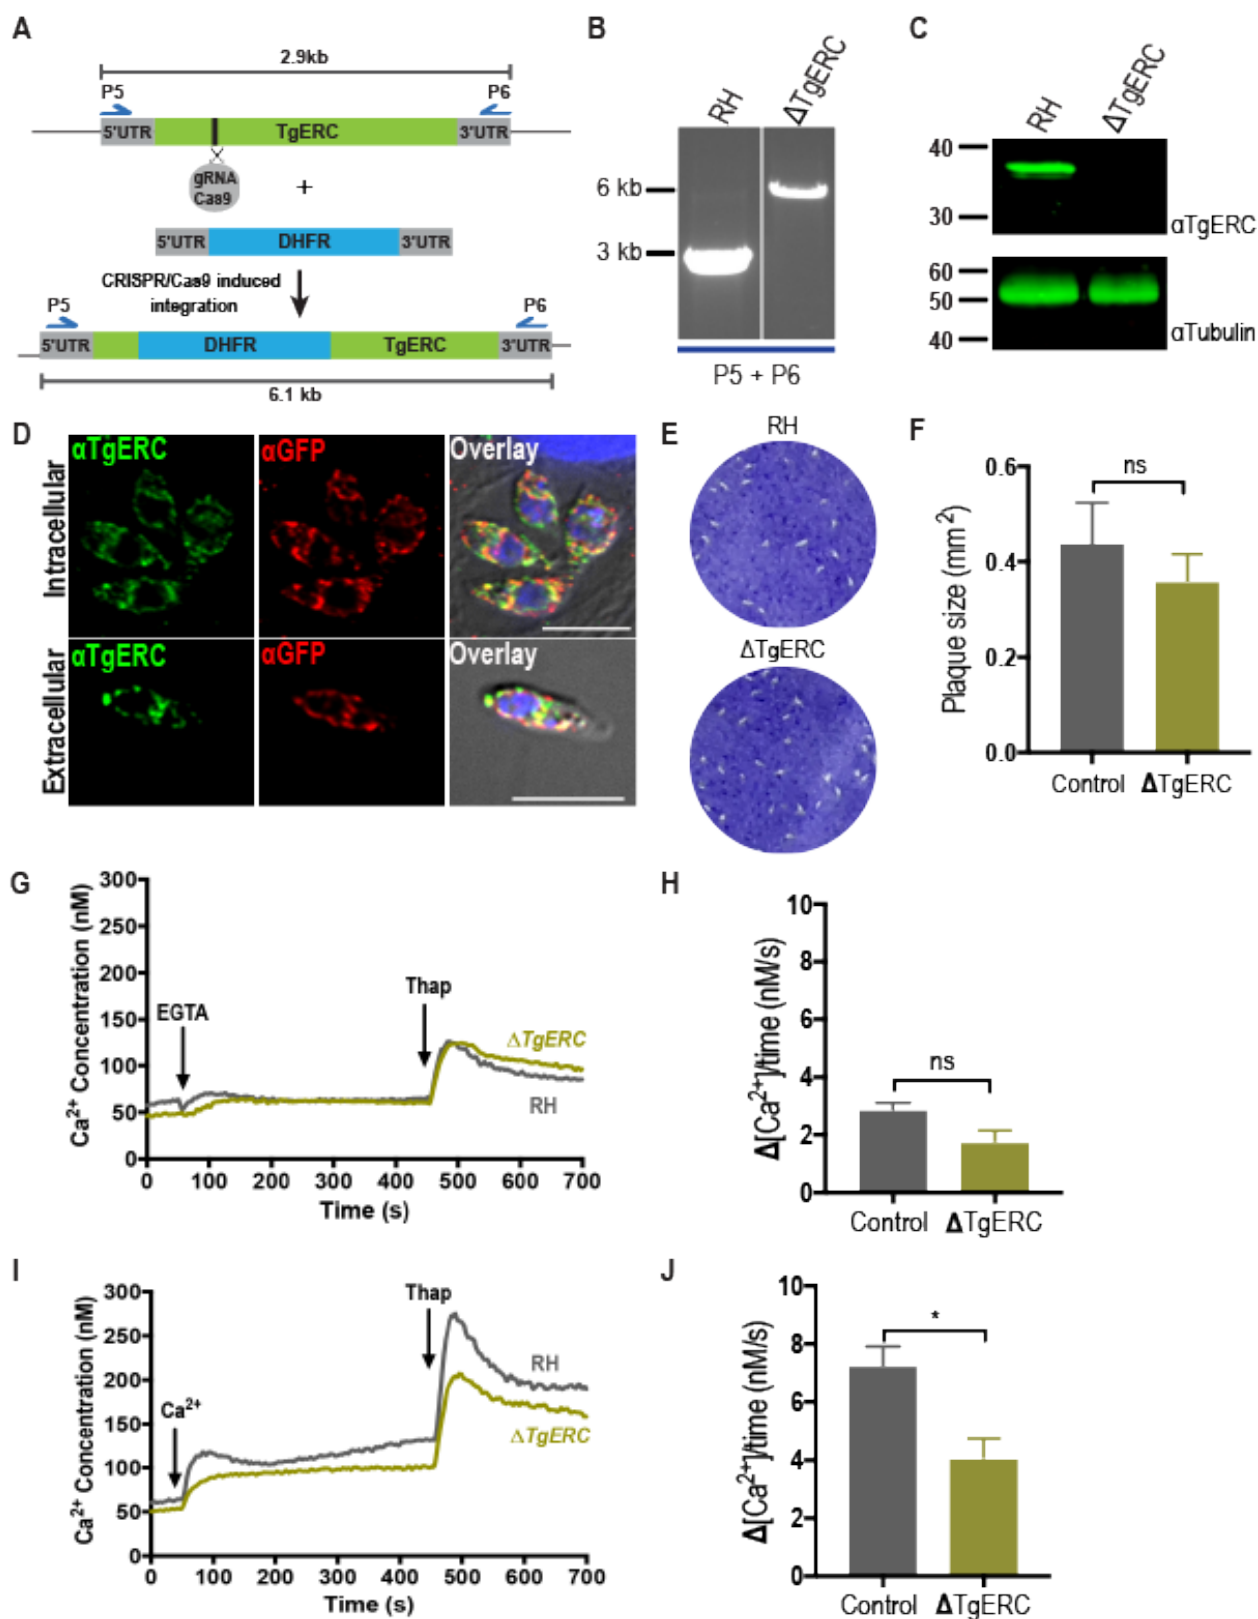

1100

1101 **Figure 4: Generation and characterization of TgERC mutants.** (A) Using  
 1102 CRISPR/Cas9, we generated *Δtgerc* mutants by introducing a DHFR cassette that

1103 disrupted the open-reading frame of TgERC. (B) PCR analysis using primers that sit on  
1104 the homology regions used for insertion showing amplification of the WT band (~3Kb) and  
1105 insertion of the DHRF cassette as demonstrated by a higher product (~6Kb) in the  
1106 mutants. (C) Western blot using generated antibodies against TgERC showing the  
1107 presence of TgERC in the RH (WT) parasites but not in the  $\Delta tgerc$  mutants.  $\alpha$ Tubulin was  
1108 used as the loading control. (D) IFAs of either extracellular or intracellular  $\Delta tgerc$  mutants  
1109 transiently transfected with the P30-GFP-HDEL plasmid (79) which contains an ER-  
1110 localized GFP. Left panel shows parasites probed with anti-TgERC antibodies, middle  
1111 panel shows presence of transfected GFP, and right panel shows overlay of staining with  
1112 DIC. Scale bar, 5 $\mu$ m. (E) Representative image of one plaque assay out of three biological  
1113 replicates. (F) Quantification of plaque sizes between RH and  $\Delta tgerc$  parasites (n=3  
1114 biological replicates; n.s.=non-significant, unpaired *t*-test). (G) Representative  $Ca^{2+}$   
1115 tracings of RH and  $\Delta tgerc$  parasites treated with the extracellular  $Ca^{2+}$  chelator EGTA and  
1116 the SERCA pump inhibitor thapsigargin. (H) Quantification of the rate of  $Ca^{2+}$  release of  
1117 RH and  $\Delta tgerc$  parasites from (G) (n=3 biological replicates; n.s.=non-significant, unpaired  
1118 *t*-test). (I) Representative  $Ca^{2+}$  tracings of RH and  $\Delta tgerc$  parasites treated with the  
1119 extracellular  $Ca^{2+}$  and thapsigargin. (J) Quantification of the rate of  $Ca^{2+}$  release of RH  
1120 and  $\Delta tgerc$  from (I) (n= 3 biological replicates, \**P*<0.05, unpaired *t*-test).

1121



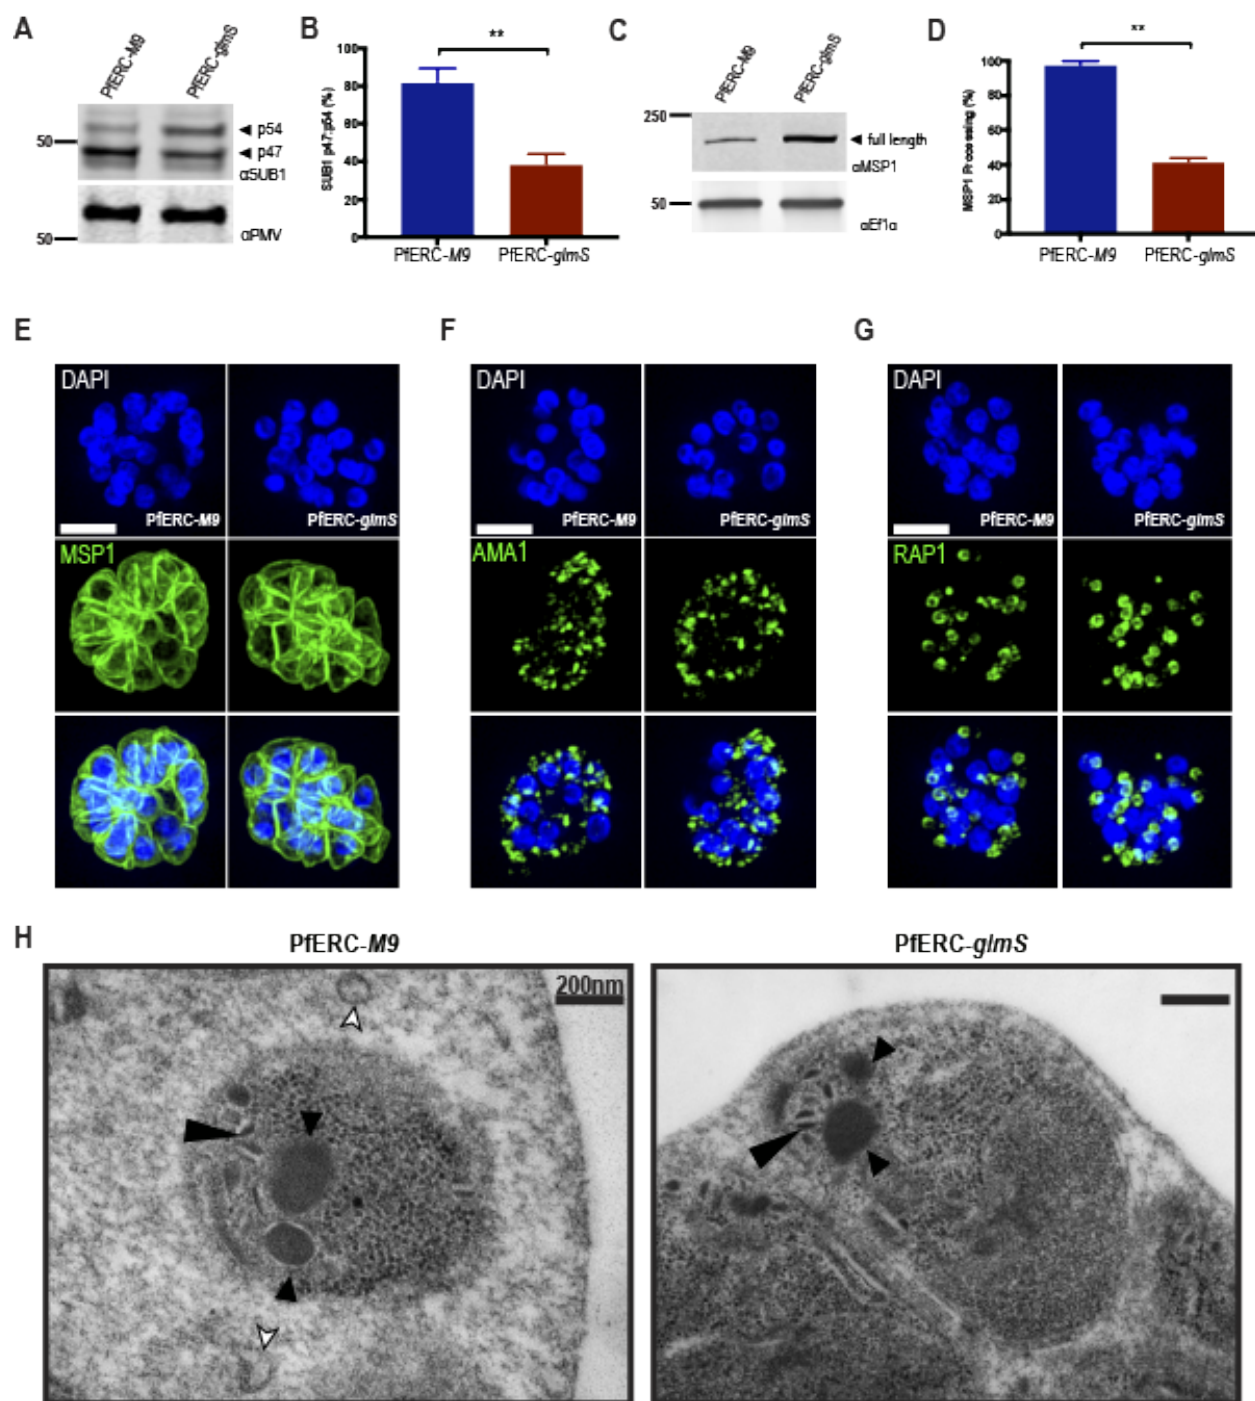

1122 **Figure 5: PfERC knockdown inhibits SUB1 and MSP1 processing.** (A) Western blot  
 1123 of parasite lysates isolated from PfERC-*glmS* and PfERC-*M9* schizonts grown in the  
 1124 presence of GlcN for 48 hours and probed with anti-SUB1 antibodies (top panel) and  
 1125 against the ER-resident protease PMV (loading control, bottom panel). One  
 1126 representative experiment out of four is shown. The protein marker sizes that co-migrated

1127 with the probed protein are shown on the left. (B) Quantification of the overall reduction  
1128 in processing of SUB1 in PfERC-*glmS* and PfERC-*M9* parasites over time after addition  
1129 of GlcN, as shown in (A). Data were normalized to the total SUB1 (processed +  
1130 unprocessed) and are represented as mean  $\pm$  SEM (n=4 biological replicates; \*\* $P$ <0.005  
1131 unpaired  $t$ -test). (C) Western blot of parasite lysates isolated from PfERC-*glmS* and  
1132 PfERC-*M9* schizonts grown in the presence of GlcN for 48 hours and probed with anti-  
1133 MSP1 antibodies (top panel) and against the anti-EF1 $\alpha$  (loading control, bottom panel).  
1134 One representative experiment out of two is shown. The protein marker sizes that co-  
1135 migrated with the probed protein are shown on the left. (D) Quantification of the overall  
1136 reduction in processing of MSP1 in PfERC-*glmS* and PfERC-*M9* parasites over time after  
1137 addition of GlcN. Quantification of the overall reduction in MSP1 in PfERC-*glmS* and  
1138 PfERC-*M9* parasites over time after addition of GlcN, as shown in (B). Data were  
1139 normalized to the loading control (EF1 $\alpha$ ) and are represented as mean  $\pm$  SEM (n=2  
1140 biological replicates; \*\* $P$ <0.005 unpaired  $t$ -test). (E-G) Representative Super-Resolution  
1141 SIM images of PfERC-*glmS* and PfERC-*M9* schizonts stained with antibodies against  
1142 MSP1, AMA1, and RAP1. From top to bottom, the images are parasites stained with anti-  
1143 MSP1 (E), anti-AMA1 (F), anti-RAP1 (G) antibodies (green), parasite nucleus stained with  
1144 DAPI (blue), and fluorescence merge images of the schizonts incubated with GlcN for  
1145 48hrs (n=2 biological replicates). Scale bar 2 $\mu$ m. (H) Representative TEM images of  
1146 PfERC-*glmS* and PfERC-*M9* schizonts grown for 48hrs with GlcN and incubated with E-  
1147 64 for 8 hours, as shown in Figure 3A (n=2 biological replicates). Small arrowheads point  
1148 to rhoptries, large arrowheads to micronemes, and white arrowheads to PVM fragments  
1149 (15). Scale bar, 200nm.

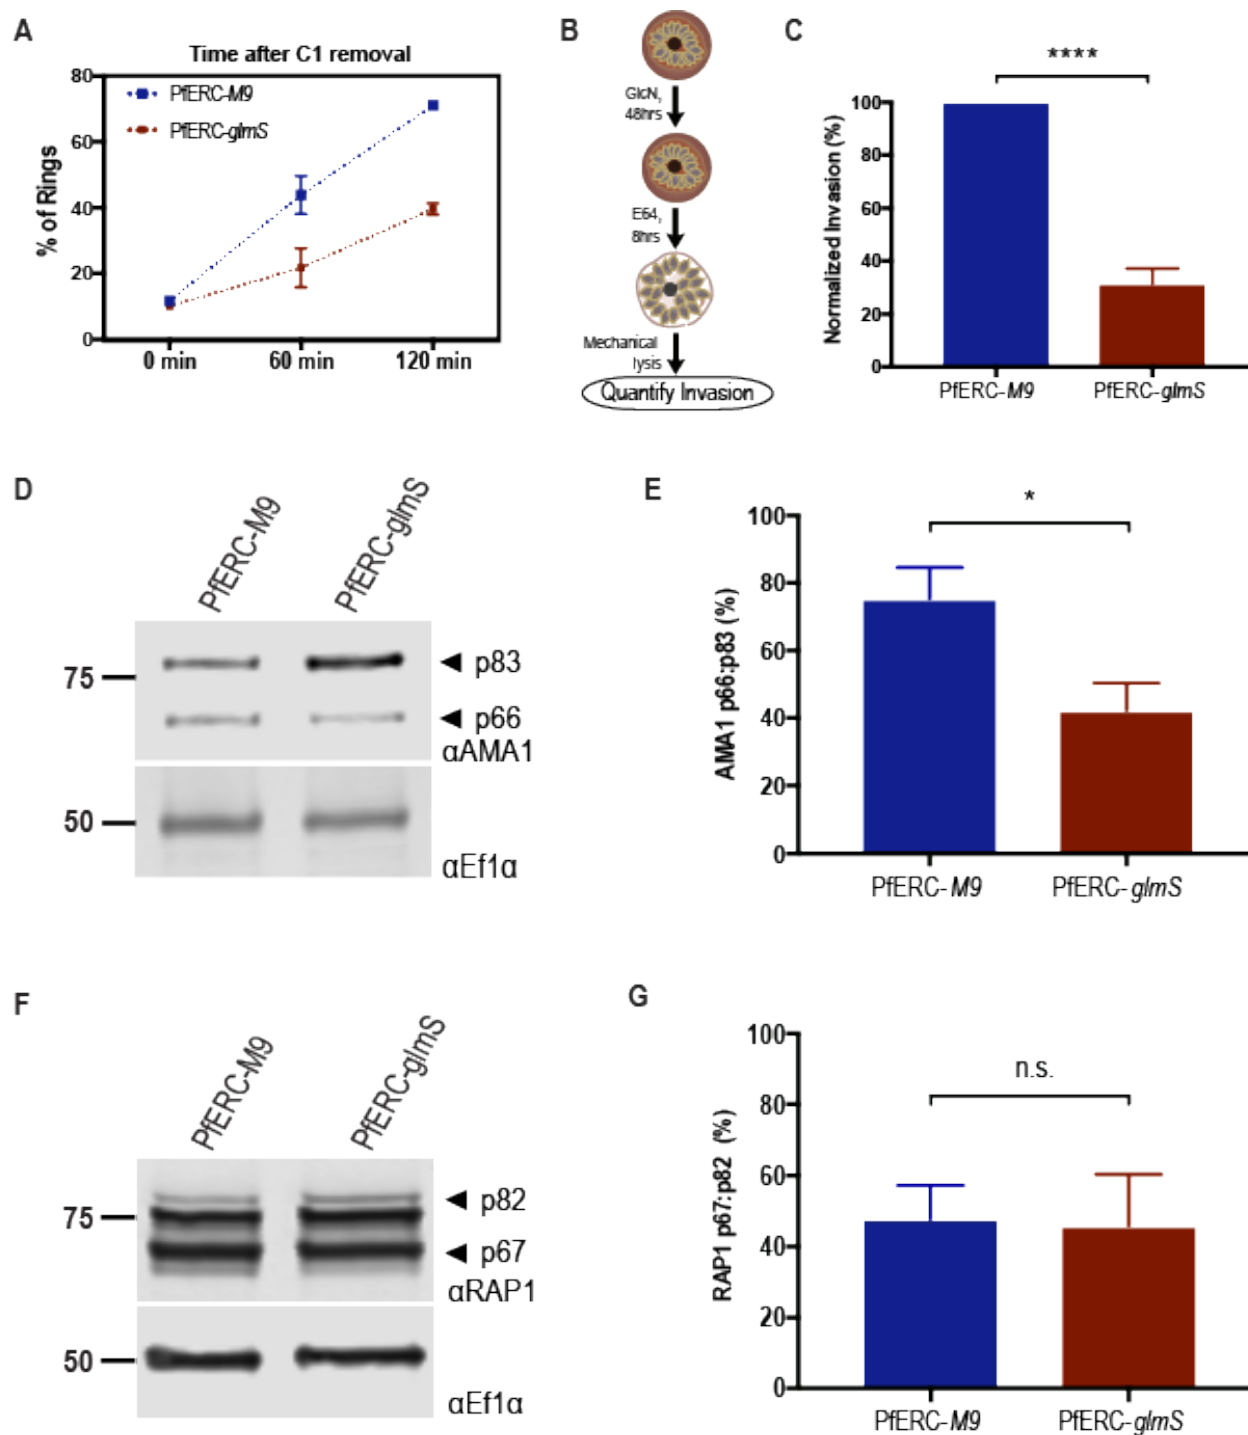

1150 **Figure 6: PfERC knockdown prevents invasion of RBCs.** (A) As shown in Figure 4A,  
 1151 synchronized PfERC-*glmS* and PfERC-M9 parasites were observed by flow cytometry  
 1152 after removal of C1 (time 0hr). Rings were quantified as a percentage of the total amount  
 1153 of parasites as determined by flow cytometry. Data are represented as the mean  $\pm$  SEM  
 1154 ( $n=3$  biological replicates). (B) Schematic showing the experimental layout to study the

1155 effect of PfERC knockdown on invasion of merozoites into host RBCs. Merozoites were  
1156 purified using mechanical lysis after 8hr incubation with E64. (C) Invasion rates of  
1157 mechanically purified merozoites from PfERC-*glmS* and PfERC-*M9* parasites, as shown  
1158 in (B), were quantified using flow cytometry (47). All replicates were normalized to PfERC-  
1159 *M9* merozoites. Data are represented as mean  $\pm$  SEM (n=7 biological replicates;  
1160 \*\*\*\* $P < 0.0001$ , unpaired *t*-test). (D) Western blot of parasite lysates isolated from PfERC-  
1161 *glmS* and PfERC-*M9* schizonts grown in the presence of GlcN for 48 hours and probed  
1162 with anti-AMA1 antibodies (top panel) and anti- EF1 $\alpha$  antibodies (loading control, bottom  
1163 panel). One representative experiment out of eight is shown. The protein marker sizes  
1164 that co-migrated with the probed protein are shown on the left. (E) Quantification of the  
1165 overall reduction in processing of AMA1 in PfERC-*glmS* and PfERC-*M9* parasites over  
1166 time after addition of GlcN, as shown in (D). Data were normalized to the total AMA1  
1167 (processed + unprocessed) and are represented as mean  $\pm$  SEM (n=8 biological  
1168 replicates; \* $P < 0.05$  unpaired *t*-test). (F) Western blot of parasite lysates isolated from  
1169 PfERC-*glmS* and PfERC-*M9* schizonts grown in the presence of GlcN for 48 hours and  
1170 probed with anti-RAP1 antibodies (top panel) and anti- EF1 $\alpha$  antibodies (loading control,  
1171 bottom panel). One representative experiment out of five is shown. The protein marker  
1172 sizes that co-migrated with the probed protein are shown on the left. (G) Quantification of  
1173 the overall reduction in processing of RAP1 in PfERC-*glmS* and PfERC-*M9* parasites over  
1174 time after addition of GlcN, as shown in (F). Data were normalized to the total RAP1  
1175 (processed + unprocessed) and are represented as mean  $\pm$  SEM (n=5 biological  
1176 replicates; n.s.=non-significant, unpaired *t*-test).

|           |     |                                                                 |                    |
|-----------|-----|-----------------------------------------------------------------|--------------------|
| Cab45     | 1   | -----MVWPWVAMASRWGFLIGLAPCCLWLLGAVLLMDASARPANHSSTRE             | RVA                |
| ERC-55    | 1   | -----MRLGPRTAALGGLL-LCAA                                        | -----AAGA          |
| Calumenin | 1   | -----MDLRQFLMCLSLCTAFA                                          | -----LSKPT         |
| RCN1      | 1   | -----MARGRGRRLGLALGLLALV                                        | -----LAPRVLRKPT    |
| TgERC     | 1   | MAAFADRPTCRVSLGAVFLARELHRLRKSLEFLCVFSL                          | -----              |
| PfERC     | 1   | -----MMKINLYKLLCFICVIL                                          | -----              |
|           |     |                                                                 |                    |
| Cab45     | 50  | NRENEILPPDHINGVKLEMDGHLNRGHHQEVFLG--KDLGGFEDAEFRRSERKLMVLF      |                    |
| ERC-55    | 23  | GKAETHYP---LGEERS-----DYDREALLGVQEDVDEYVK-LGHEEQQRLOATI         |                    |
| Calumenin | 23  | EKKDRVHHEPQ-LSDRVHNDQA--SFDYDHD AFLG-AEEAKTFDQ-LTPPEESKERLQKIV  |                    |
| RCN1      | 33  | VRKERVVRPDSSELGERPPEDNQ--SFQYDHEAFLG-KEDSKTFDQ-LTPDESKERLQKIV   |                    |
| TgERC     | 38  | ---FLFSFAFSALSGAPSQFAE-----AAMPKLS-GEKLAELMQ-MDVKLIKERNLALF     |                    |
| PfERC     | 19  | -----LHKNVVRSGDNMKYND--MKGLDLSKLN-DIQVKLILG-LKIDGAKERTEKLF      |                    |
|           |     |                                                                 |                    |
| Cab45     | 108 | SKVDVNTDRKISAKENQRWLEKTAEHFQEAAMEESKTHFRAVDFDGDGHVSWDEYKVKFL    |                    |
| ERC-55    | 71  | KKIDLDS DGFLT ESELSSWIQMSFKHYA---MQEAKQQFVEYDKNSDDTIVTWDEYNIQM- |                    |
| Calumenin | 78  | SKIDGDKDGFVIVDELKDWIKFAQKRWI---YEDVERQWKCHDLNEDGLVSWEEYKNAT-    |                    |
| RCN1      | 89  | DRIDNDGDGFVTTEELKIWIKRVQKRYI---FINVAKVWKDYDRDKDKISWEEYKQAT-     |                    |
| TgERC     | 87  | DLIDTNO DNTIDTEBAKEWSAKIKNAMH---QHQVMEFOAIDKDN DKGVSLSLELEAT--  |                    |
| PfERC     | 69  | HLIDKNNDKEITBEELNHWSSFLKNEIF---IKQVQAEMGQIDS DKGFI SLNELNDA--   |                    |
|           |     |                                                                 |                    |
| Cab45     | 168 | ASKGHSEKEVADARLNEELKVDEETQEVLENLK---DRWIQADSPFADLLLTEEEELSE     |                    |
| ERC-55    | 127 | -----YDRVTFDFENTALDDAEESEFRKHLKDKKREKANKDSDGPGLSLEEEETAF        |                    |
| Calumenin | 134 | -----YGYVLDDP-----DPDGGFNKQMMVRDERRFKMADKDGDLIATKEEETAF         |                    |
| RCN1      | 145 | -----YGYVLGNPAEFH--DSSDHTTEKKMLPRDERRFKAADLNGDLTATREEEETAF      |                    |
| TgERC     | 142 | -----YVDSL-----DQKQLDQHKKEV---EQRFKTVDKDNDGLLDLSEIRIL           |                    |
| PfERC     | 124 | -----FAQNL-----LAKVEVKHSEGL---LKRQIVDKDKDGLKLSINEVGLL           |                    |
|           |     |                                                                 |                    |
| Cab45     | 225 | LHPHRSRMLRFMVKELVRLDLDQDGDQQLSVPEFISLFPVGTVENQQGQDIDDNWVKDRRK   |                    |
| ERC-55    | 178 | EHPEEVDYMTTEFVLOEALAEHDKNGDGFVSLEEEFT---GDYRWDP TANEDEPEWILVEKD |                    |
| Calumenin | 180 | LHPEEYDMKDIVVQETMEDIDKNADGFI DLEEYI---GDMYSHDGN TDEPEWVKTERE    |                    |
| RCN1      | 195 | LHPEEYEFHMKEIVVLETLLEDIDKNGDGFVQDEYI---ADMFSHEENGPEPDWVLSERE    |                    |
| TgERC     | 182 | MDPGKDEGLMKIEEELINAQDKNGDRKITVTEFTI---ETECTGSLNDVVKTEETE        |                    |
| PfERC     | 164 | LDPMKDEELKELEINEILLEHHDVNKGDKISLDEEK---QTRSDSSCVKKD--DEMALD     |                    |
|           |     |                                                                 |                    |
| Cab45     | 285 | EFEELIDSNHDGIVTAEELDES YMDFMNEYNALNEAKQMTAVADEN-QNH-FLPEEVLKY   |                    |
| ERC-55    | 234 | RFVNDYDKDNDGRLDPOELLPWVFNNGGIAQEEALHLIDEMDLN-GDK-KLS EEEILEN    |                    |
| Calumenin | 236 | QVEFRDNRDQKMDKEETKDWILPSDYDHAEEAEARHLVYESDQNKDG-KLTKEEIVDK      |                    |
| RCN1      | 251 | QNEFRDINKDGKLDKDEIRHWILPQDYDHAQAEARHLVYESDQNKDG-KLTKEEILEN      |                    |
| TgERC     | 234 | KEFKSYDLNADGADVVEELQQIIL---KDPHSHEIRMLLEEFKDKLKDQ-KVGREQWEKE    |                    |
| PfERC     | 218 | DE-NEFDANKDGFIDKEELIKVY---EDPAHESCAINVNEIKENIFGKKITYLWNEK       |                    |
|           |     |                                                                 |                    |
| Cab45     | 343 | SEFFTGSKLVYARSV-----                                            | H                  |
| ERC-55    | 292 | PDLFTTSEATDYGRQLH-----                                          | DLYFYH             |
| Calumenin | 294 | YDLFVGSQATDFGEALV-----                                          | RH                 |
| RCN1      | 309 | WNMFVGSQATNYGEDLT-----                                          | KNH                |
| TgERC     | 289 | FESFAVSMLTNNGEVLRFPEDEY-----SGIEFP-----FKTAVPQVDLLDEDRH         |                    |
| PfERC     | 273 | ALKIAVTISTDYGLVIRYPEDFKLDIGKNVILPTARSRAFE                       | DDMDADNTEDEKDEADDA |
|           |     |                                                                 |                    |
| Cab45     | 360 | -----EEF                                                        |                    |
| ERC-55    | 315 | -----DEL                                                        |                    |
| Calumenin | 313 | -----DEF                                                        |                    |
| RCN1      | 329 | -----DEL                                                        |                    |
| TgERC     | 333 | -----DEL                                                        |                    |
| PfERC     | 333 | SQQKSPAIDEL                                                     |                    |

1178 **Supplementary Figure 1:** Sequence alignment of TgERC and PfERC to other members  
1179 of the CREC family of proteins using MUSCLE alignment, viewed using JalView Software  
1180 (<http://www.jalview.org/>) and BOXSHADE (82). Alignment was done using the human  
1181 homologs: Cab-45, ERC-55 (RCN2), Calumenin, and Reticulocalbin1 (RCN1). Identical  
1182 residues are shaded in black, similar residues are shaded in gray, and EF-hands are  
1183 highlighted in red.

1184

1185

1186

1187

1188

1189

1190

1191

1192

1193

1194

1195

1196

1197

1198

1199

1200



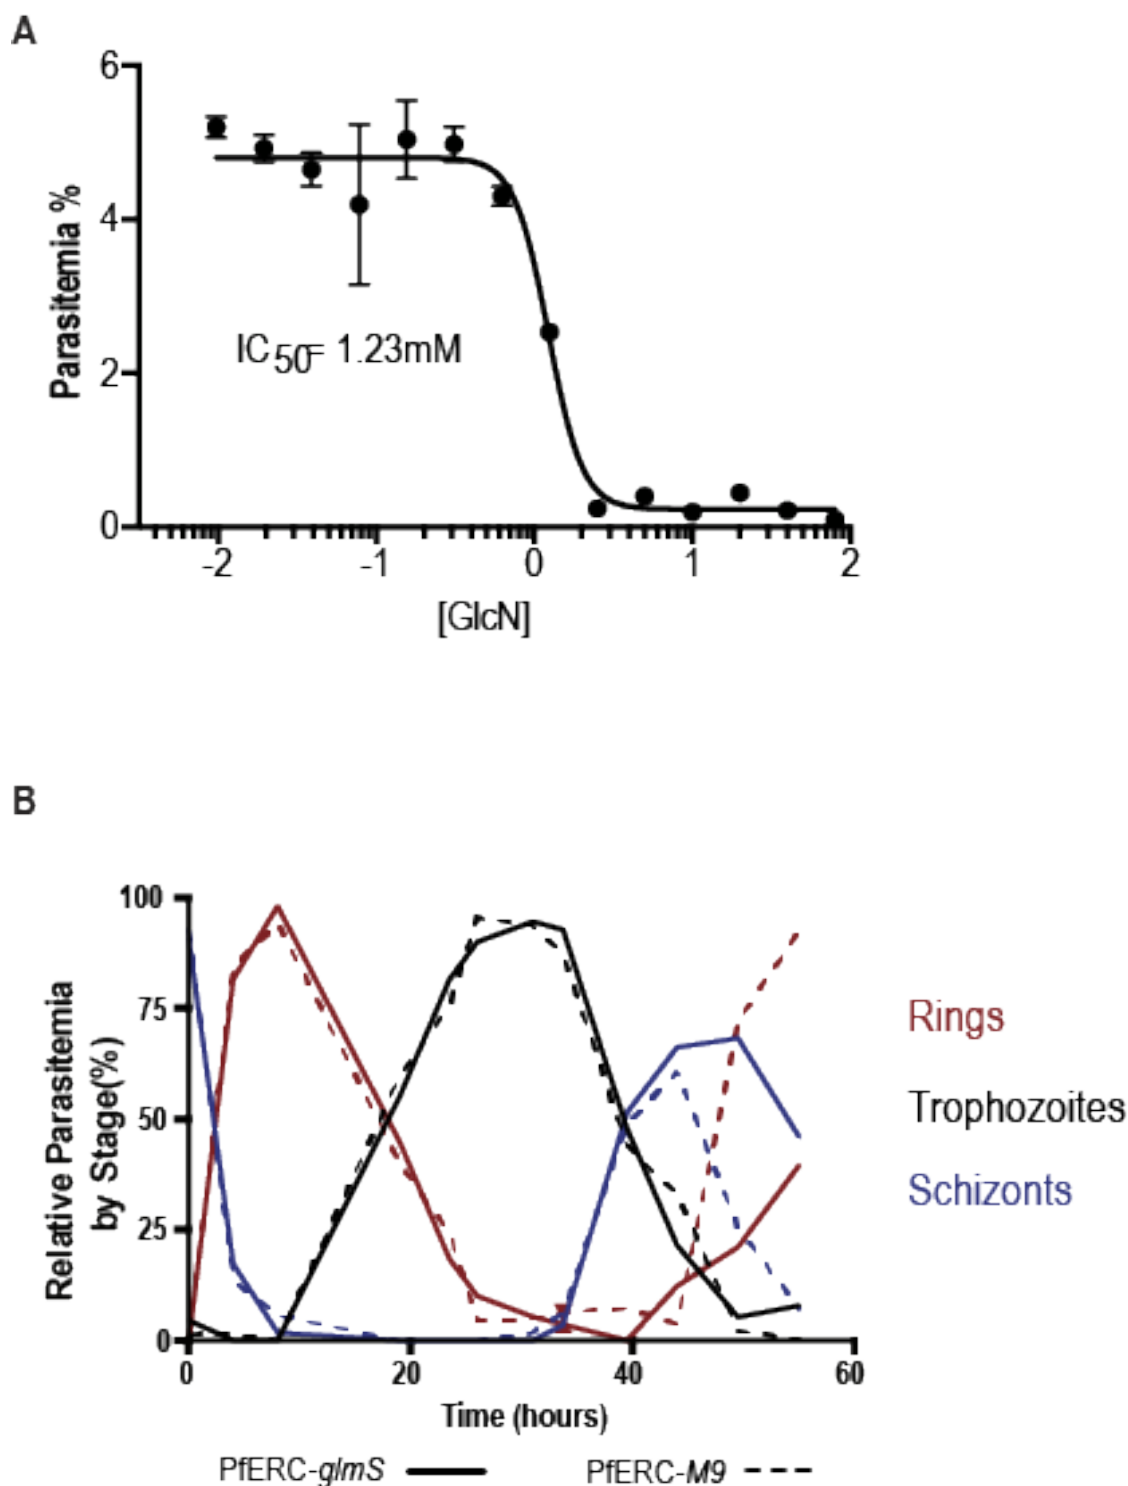

1201 **Supplementary Figure 2:** Effect of PfERC knockdown on parasite growth. (A)  
1202 Representative graph (one out of three) showing dose-dependent response of PfERC-  
1203 *glmS2* to GlcN. Asynchronous PfERC-*glmS* parasites were incubated in different  
1204 concentrations of GlcN and growth after three days was assessed by flow cytometry. Data

1205 are represented as mean  $\pm$  SEM of n=3 biological replicates. (B) Representative life cycle  
1206 graph showing all stages from Figures 3D and 3F (n=2 biological replicates).

1207

1208

1209

1210

1211

1212

1213

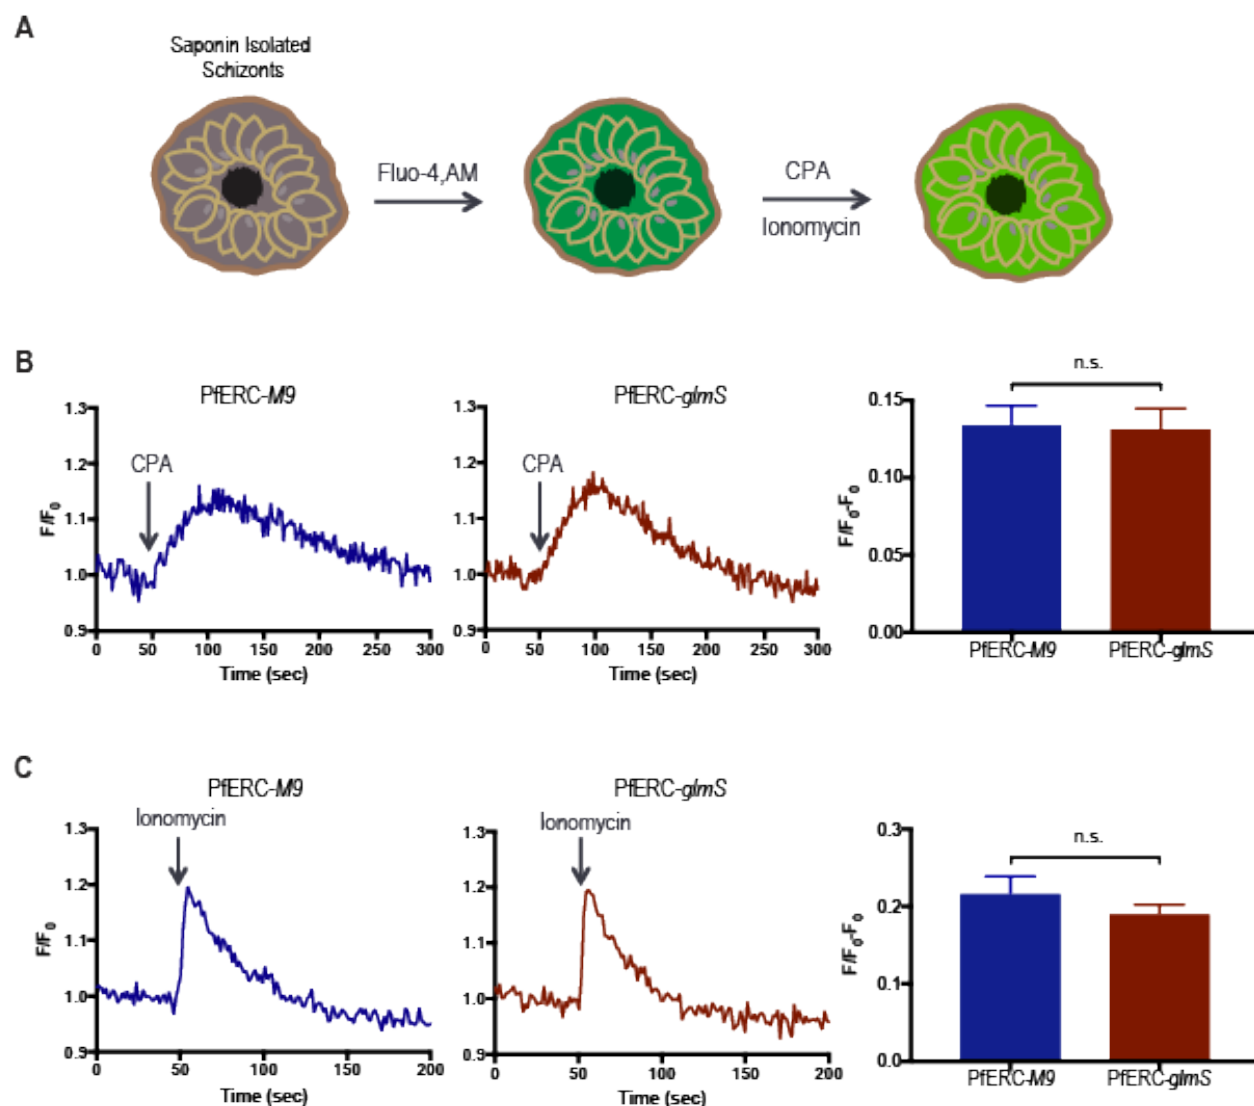

1214

1215 **Supplementary Figure 3:** Effect of PfERC knockdown on  $Ca^{2+}$  in the ER. (A)  
1216 Experimental schematic showing how  $Ca^{2+}$  measurements were done in PfERC-glmS  
1217 and PfERC-M9 mutants. Synchronized PfERC-glmS and PfERC-M9 schizonts were  
1218 incubated with GlcN for 48 hours and isolated using saponin lysis, which lyses the RBC  
1219 membrane but leaves the PV intact. Abbreviations: CPA- cyclopiazonic acid (B)  
1220 Representative fluorescence tracings after CPA addition to PfERC-glmS and PfERC-M9  
1221 schizonts, isolated as in (A). Quantification was done by calculating the difference in  
1222 fluorescence between the basal to the highest peak of fluorescence. Data are  
1223 represented as the combined mean  $\pm$  SEM (PfERC-glmS; n=15 biological replicates;  
1224 PfERC-M9; n=9 biological replicates; n.s- non-significant, unpaired *t*-test). (C)

1225 Representative fluorescence tracings after Ionomycin addition to PfERC-*glmS* and  
1226 PfERC-*M9* schizonts, isolated as in (A). Quantification was done by calculating the  
1227 difference in fluorescence between the basal to the highest peak of fluorescence. Data  
1228 are represented as the combined mean  $\pm$  SEM (PfERC-*glmS*; n=9 biological replicates;  
1229 PfERC-*M9*; n=5 biological replicates; n.s- non-significant, unpaired *t*-test).

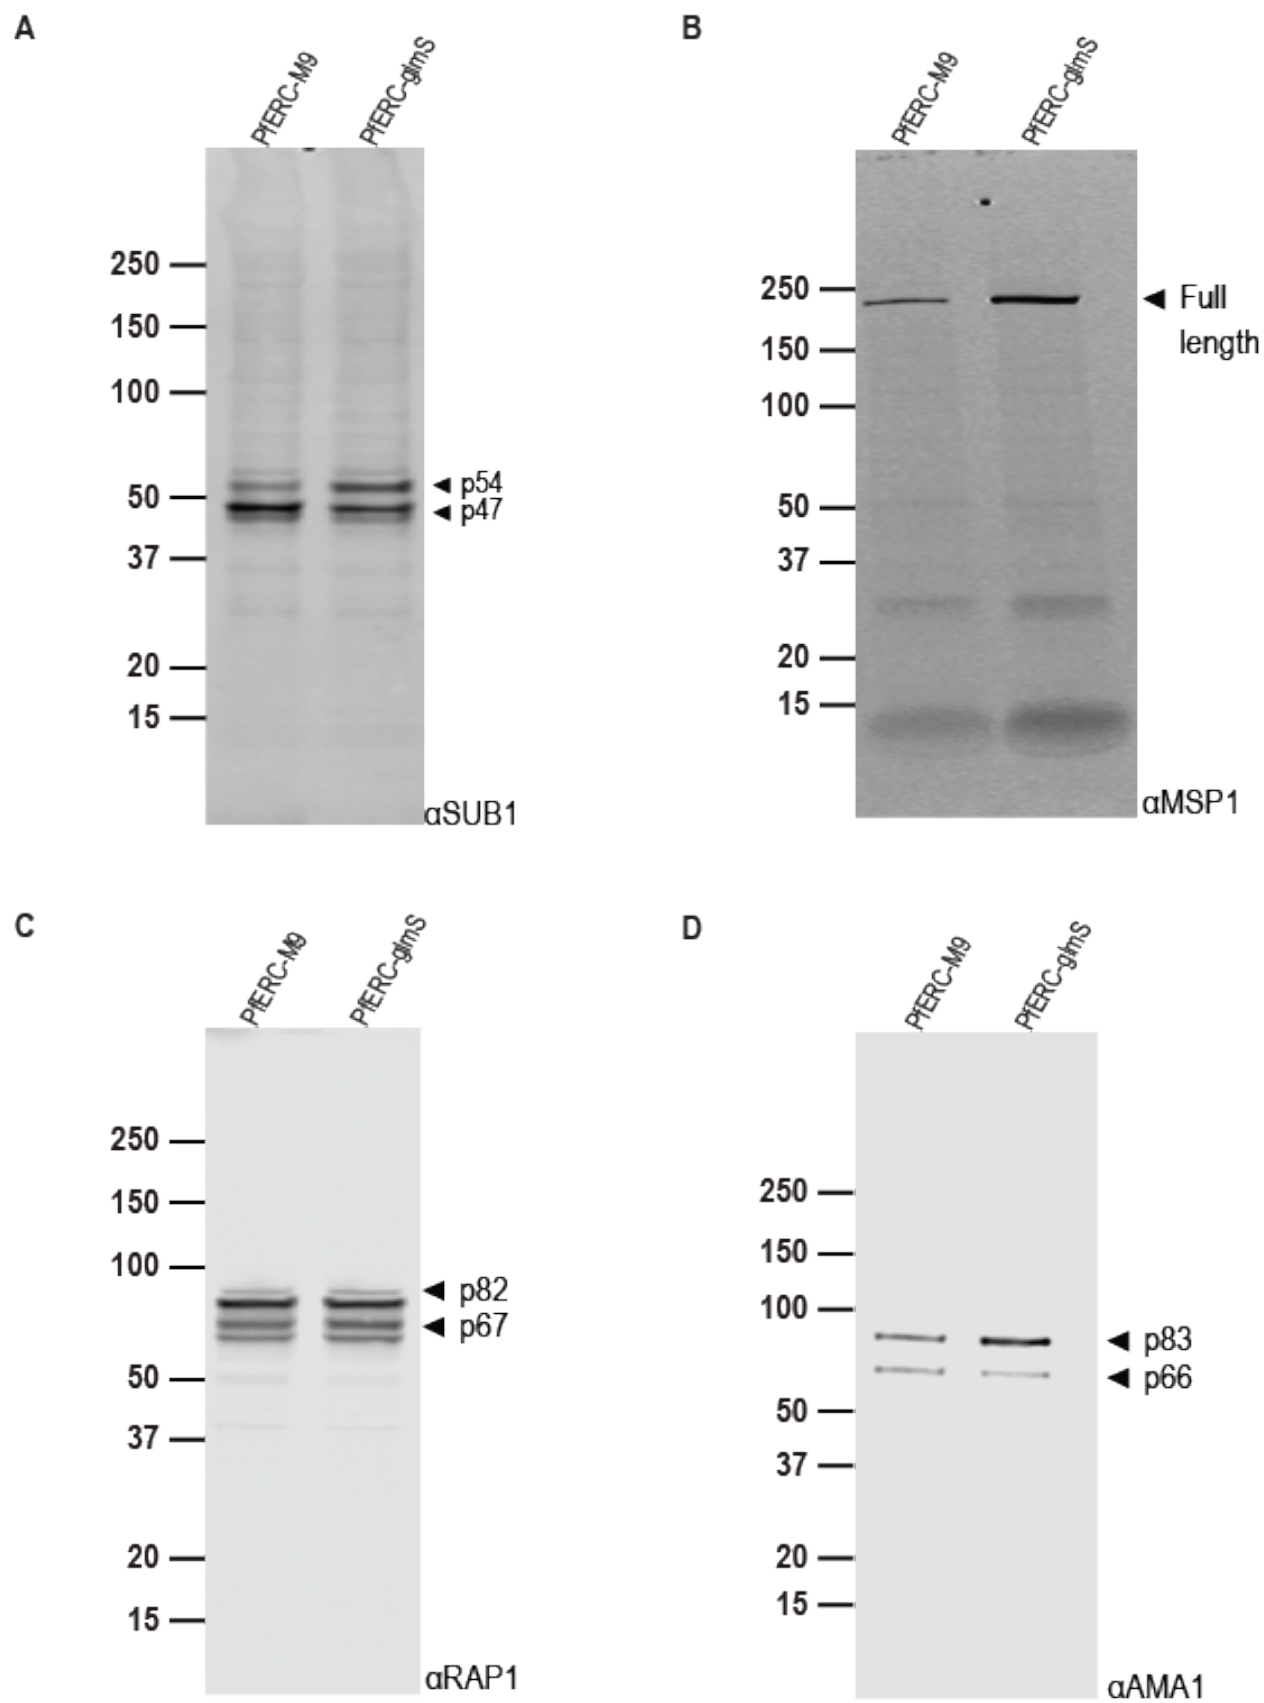

1231 **Supplementary Figure 4:** Representative whole-blot images of Western blots of lysates  
1232 from PfERC-*glmS* and PfERC-*M9* schizonts incubated with GlcN for 48 hours, probed  
1233 with anti-SUB1, anti-MSP1, anti-AMA1, and anti-RAP1 antibodies from Figures 5 and 6.  
1234 The protein marker sizes that co-migrated with the probed protein are shown on the left.

1235

1236

1237

1238

1239

1240

1241

1242

1243

1244

1245

1246

1247

1248

1249

1250

1251

1252

1253



1254 **Table S1:** Primers used in this study.

| Primer | Primer Sequence                                                                    |
|--------|------------------------------------------------------------------------------------|
| 1      | GCGGCGATGCCCAAGTTGTCGTTTTAGAGCTAGAAATAGC                                           |
| 2      | AACTTGACATCCCCATTTAC                                                               |
| 3      | CGACTGTTCCCCCAATCAATTCTACTTTTCGTCGCTTATCTCGAGAAAACA<br>AAGCTTCGCCAGGCTGTAAATCC     |
| 4      | CTCCTGTCCGCAGAAGCTCTGTACGTGTTCTCAACAAGCTCTTCATG<br>TTCATCCTGCAAGTGCATAGAAGGAAAGTTG |
| 5      | TCCGACTCTCCAACGTGGTTGC                                                             |
| 6      | GCTGCTACACAGCACTCCCTG                                                              |
| 7      | CTGCAGGTCTGGACATTTAAAGTTCATCACTAGCGTAATCTGGAACATCG                                 |
| 8      | CGATGTTCCAGATTACGCTAGTGATGAACTTTAAATGTCCAGACCTGCAG                                 |
| 9      | AATTCGCCCTTTCCGCGGAGAATAGAAAAATTATTTCAATTTGATAGATAAA<br>AACAATGAT                  |
| 10     | TGGGTAAGTAGTAGCGCTTAATTCATCAATTGCTGGGGATTTTTGTTGCGA<br>TGCATCGTC                   |
| 11     | ATGATCTTGCCGGCAAGCTTTTTATATAAACATATTTTTTTTTTTTTAACAT<br>AAAGGG                     |
| 12     | CCTTGAGCTCGCTAGCGACAAATTGGATAGATAATAGGGGGTACAAATAT<br>ACATAC                       |
| 13     | AAGTATATAATATTCAATTGCTGGGGATTTTTGTGTTTTAGAGCTAGAA                                  |
| 14     | TTCTAGCTCTAAACACAAAAATCCCCAGCAATTGAATATTATATACTTA                                  |
| 15     | GCAAGATCATGTGATTTCTCTTTGTTCAAGGAGTCACCCCC                                          |
| 16     | GACGACGACAAGATAATGGCGGCCTTCGCAGACAG                                                |
| 17     | GAGGAGAAGCCCGGTCAGTTCATCGTGTTTGTCTTCGTCGTCG                                        |

1255

1256
